# Supplementary material for: Catalytic asymmetric Tamura cycloaddition of homophthalic anhydrides with 2-arylidene-1,3-diones
Source: Royal Society of Chemistry journal article supplement (doi:10.1039/c8ob01970c), 2018-01-01
Supplement: c8ob01970c1.pdf [file c8ob01970c1.pdf]

## Supporting Information

### Catalytic Asymmetric Tamura Cycloaddition of Homophthalic Anhydrides with 2-Arylidene-1,3-diones

Han Xu, Feng Sha, Qiong Li, Xin-Yan Wu\*

*Key Laboratory for Advanced Materials and Institute of Fine Chemicals, School of  
Chemistry & Molecular Engineering, East China University of Science and  
Technology, Shanghai 200237, P. R. China*

[xinyanwu@ecust.edu.cn](mailto:xinyanwu@ecust.edu.cn)

### Table of Contents

|                                                       |            |
|-------------------------------------------------------|------------|
| <b>1. Copies of NMR Spectra of the Products.....</b>  | <b>S2</b>  |
| <b>2. Copies of HPLC Spectra of the Products.....</b> | <b>S24</b> |
| <b>3. X-ray Analysis of Product 3e.....</b>           | <b>S47</b> |

# 1. Copies of NMR Spectra of the Products

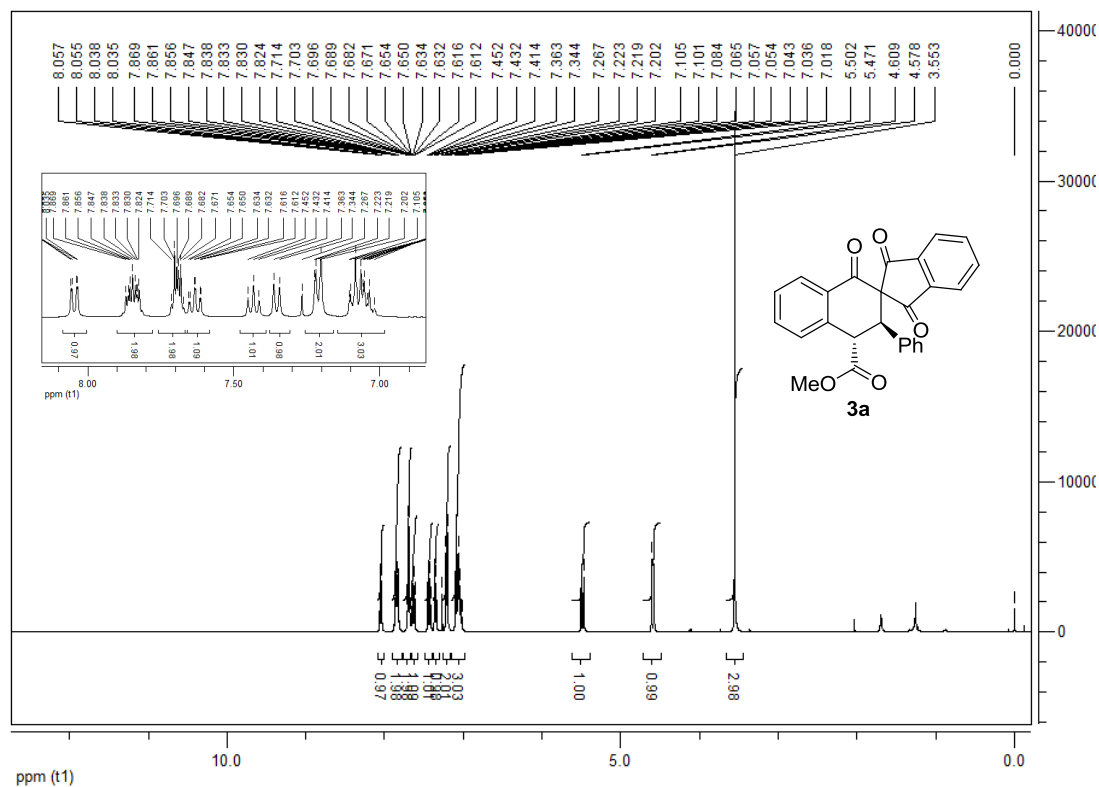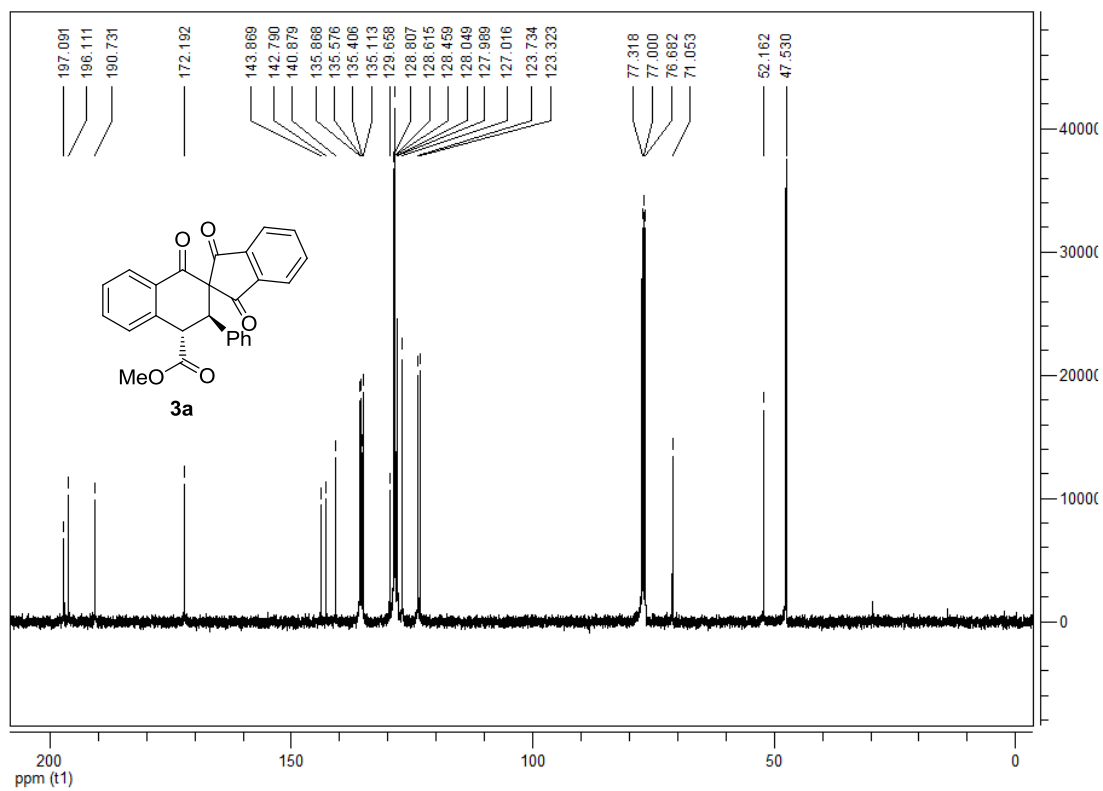

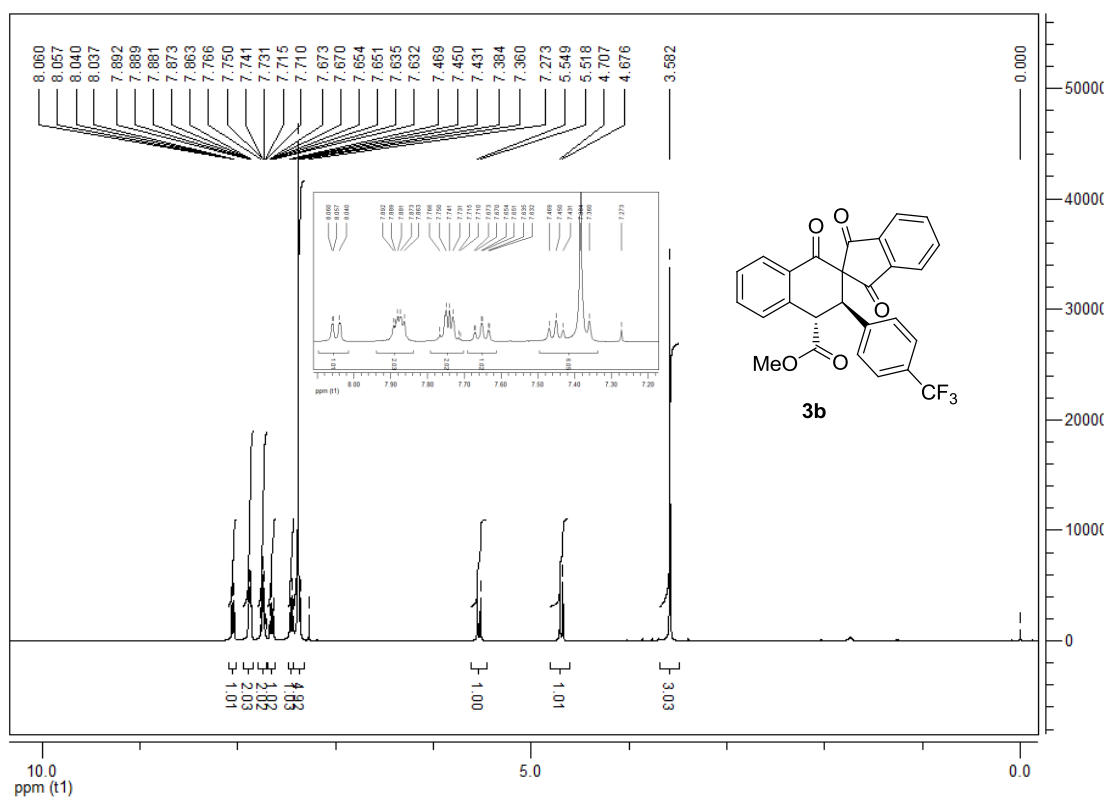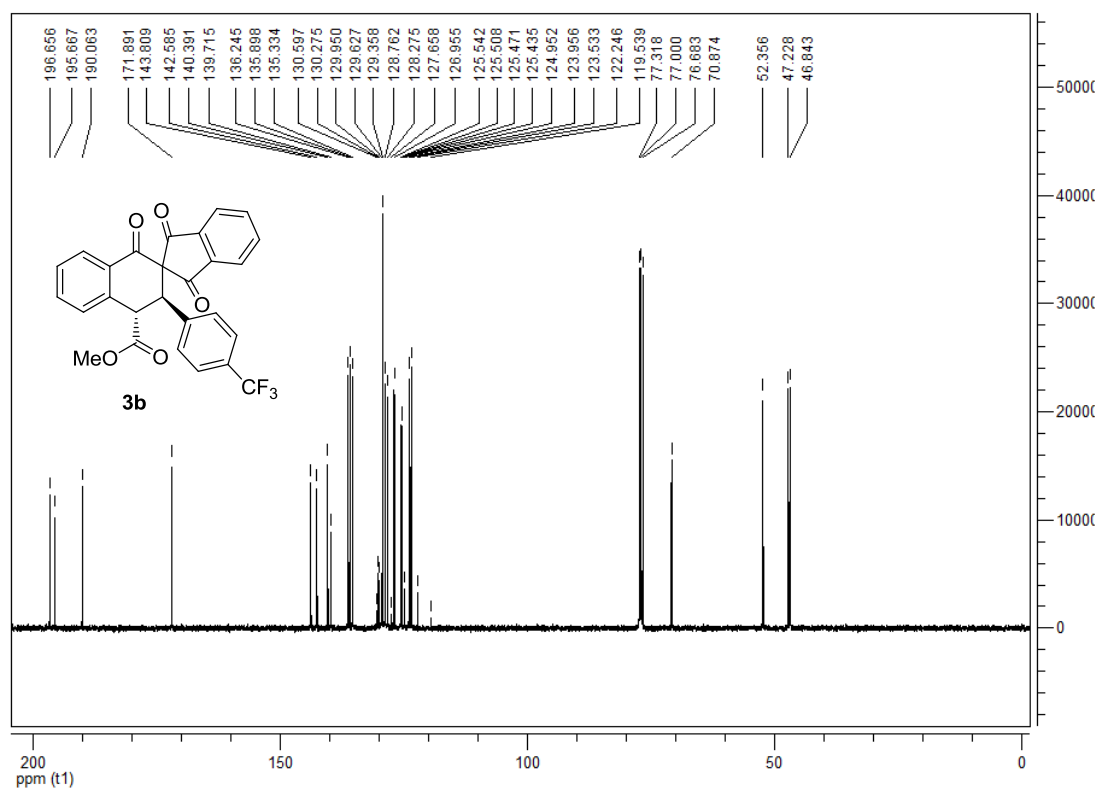

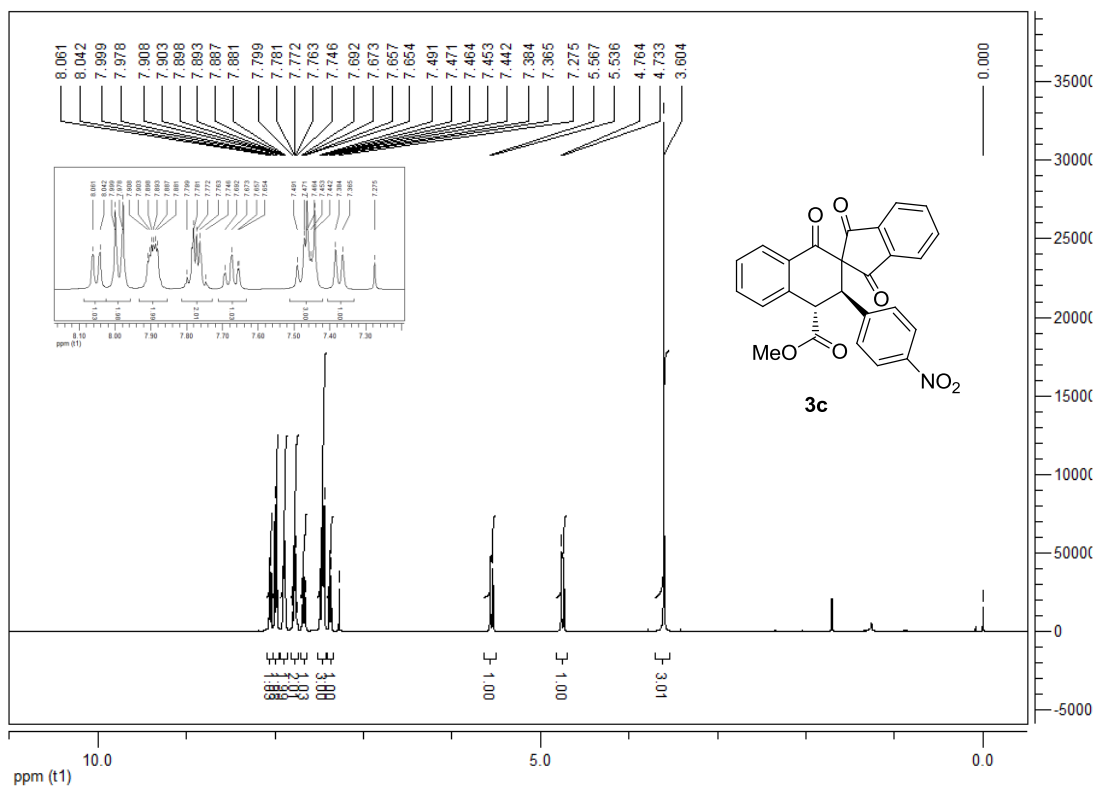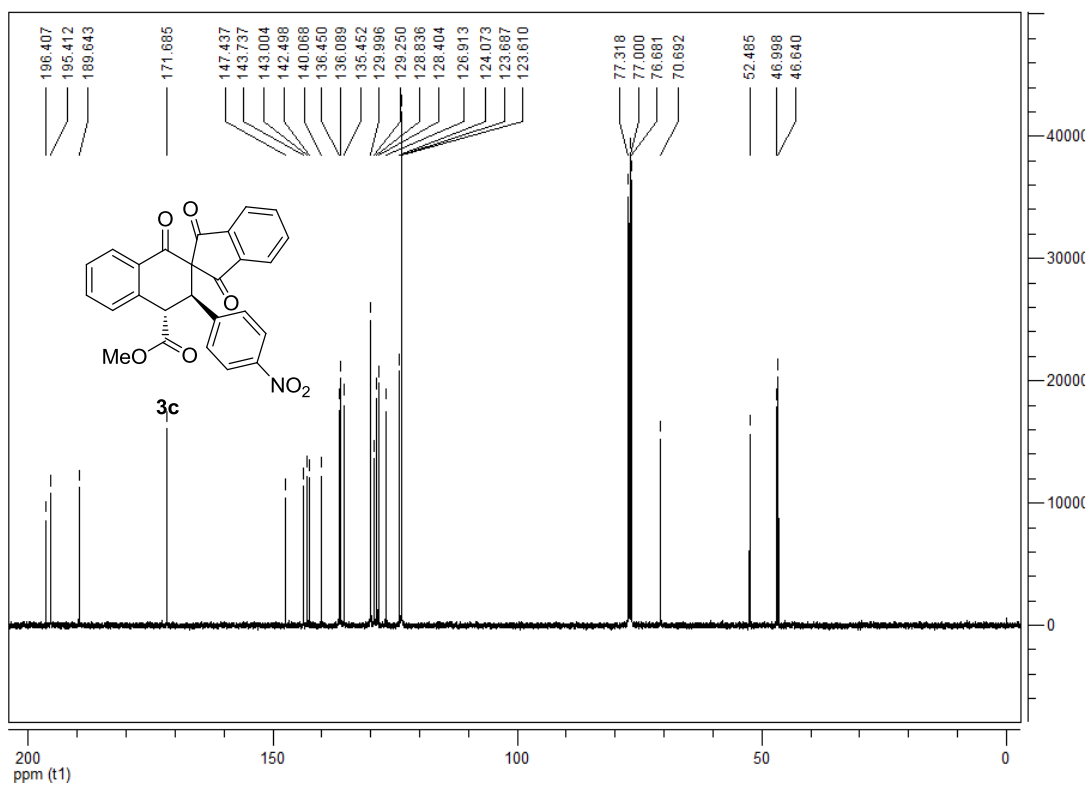

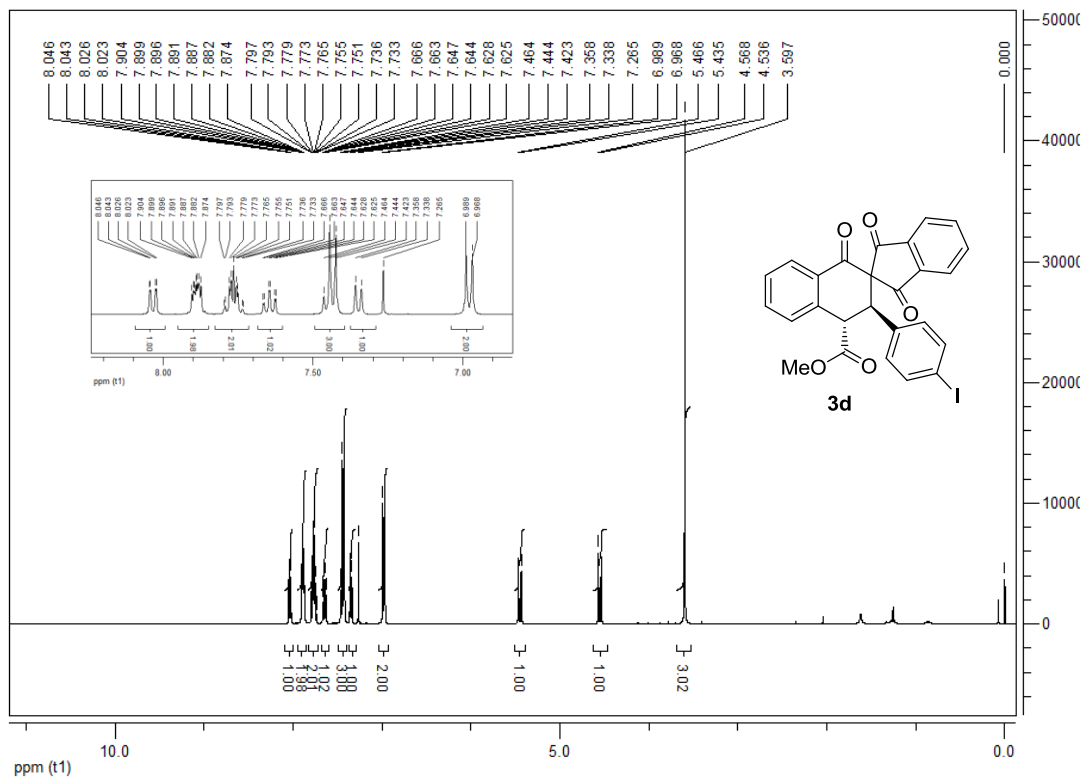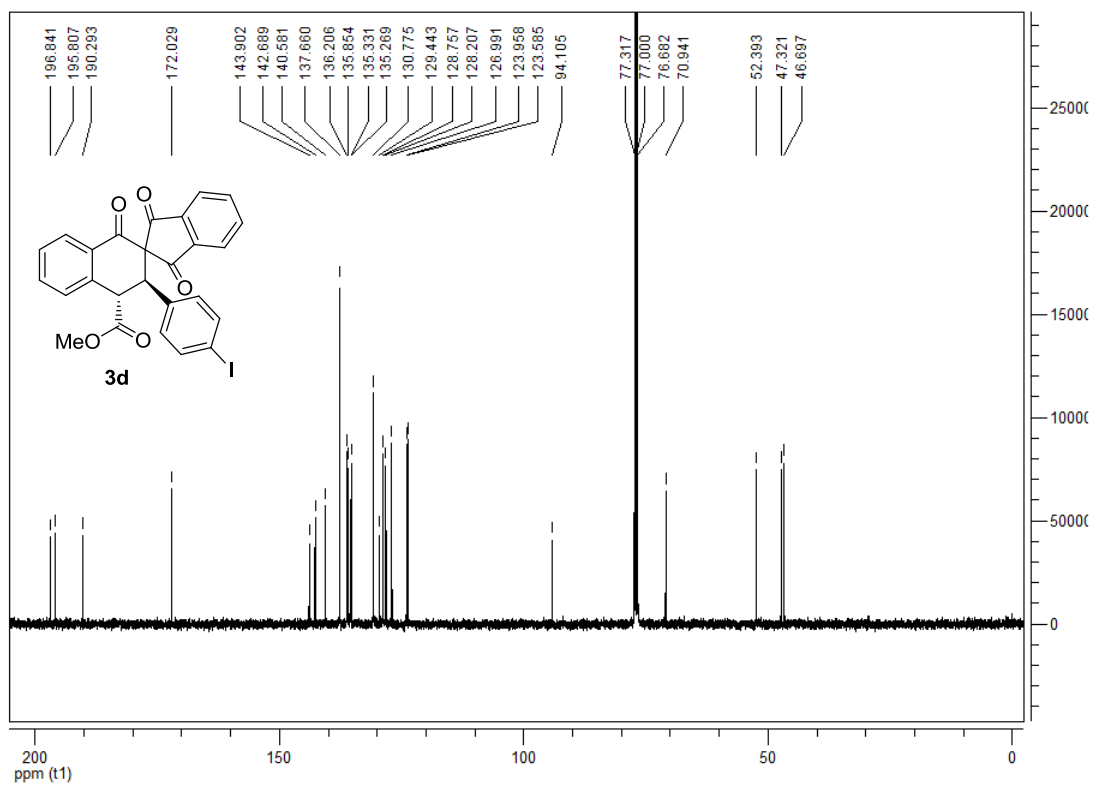

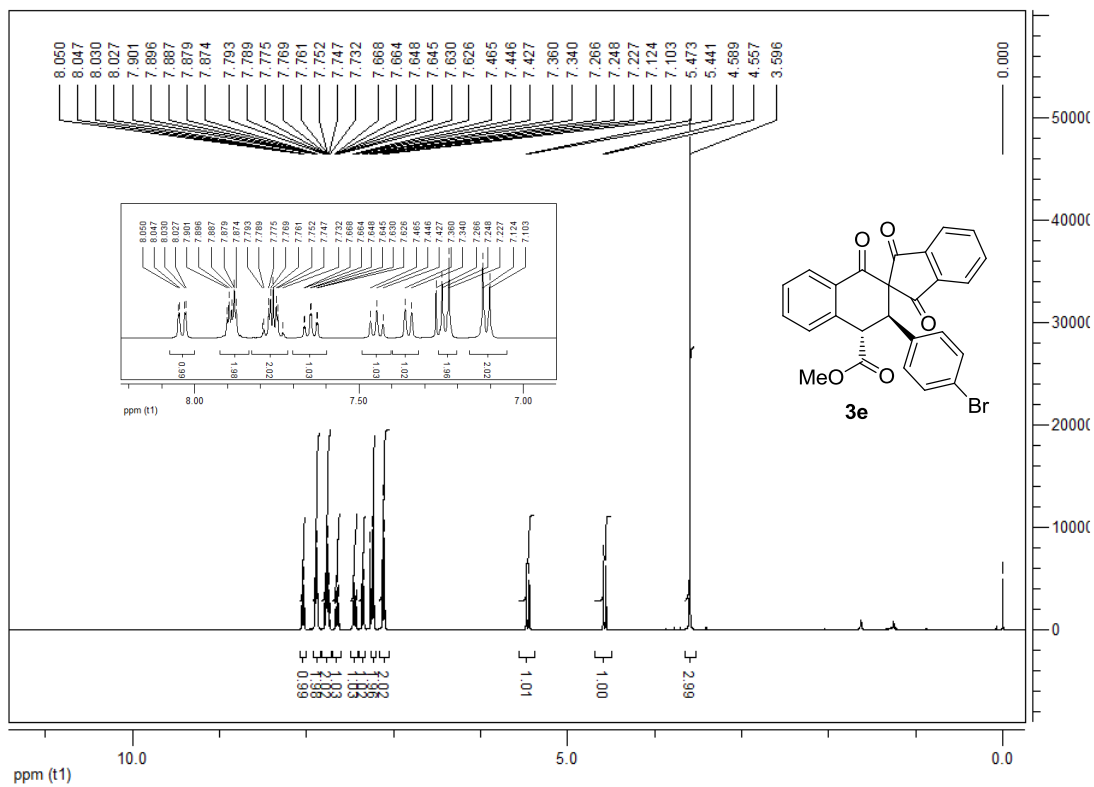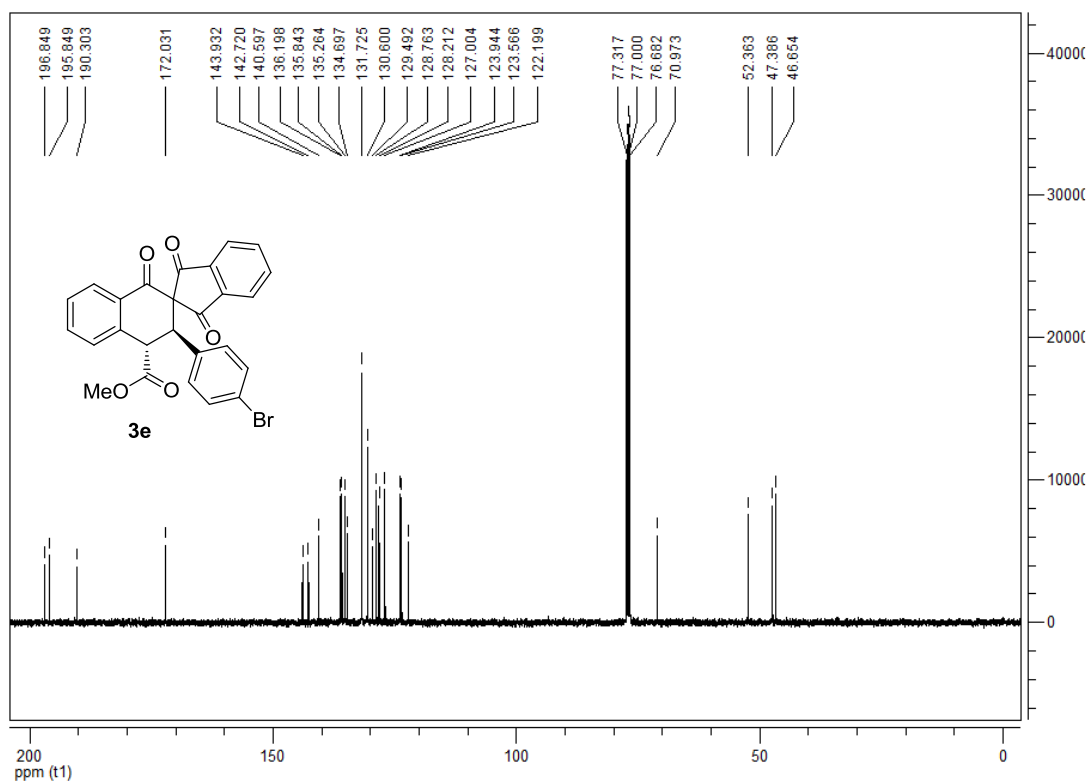

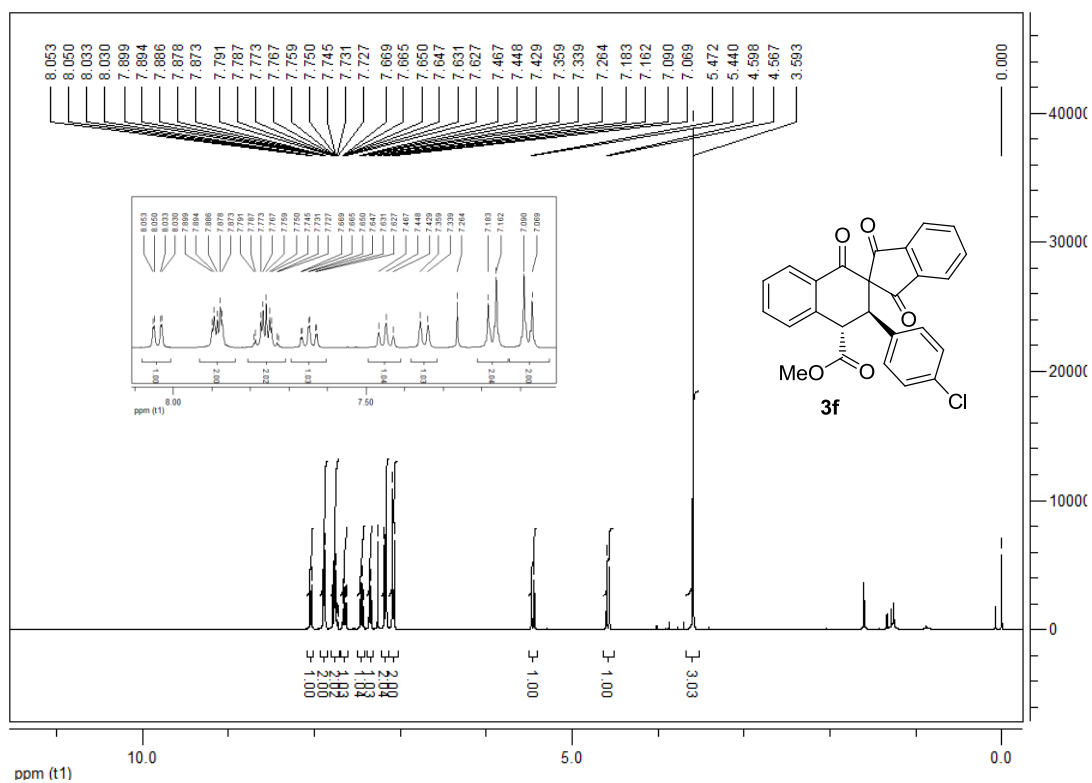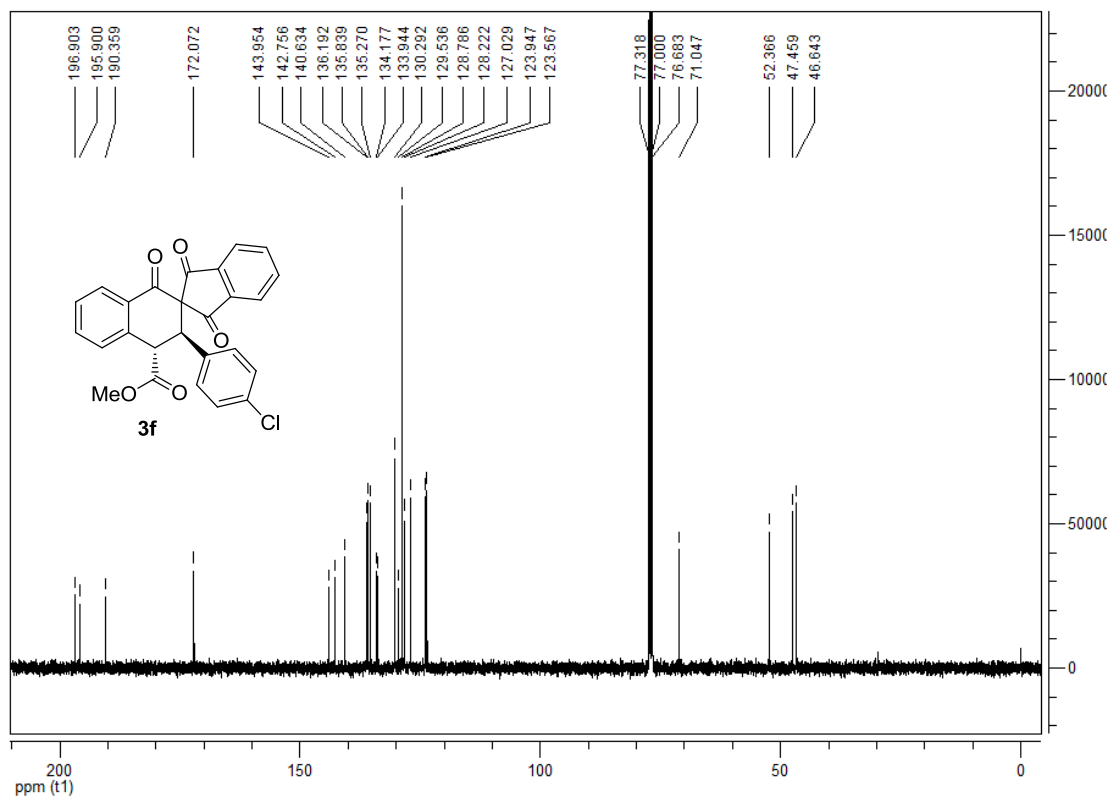

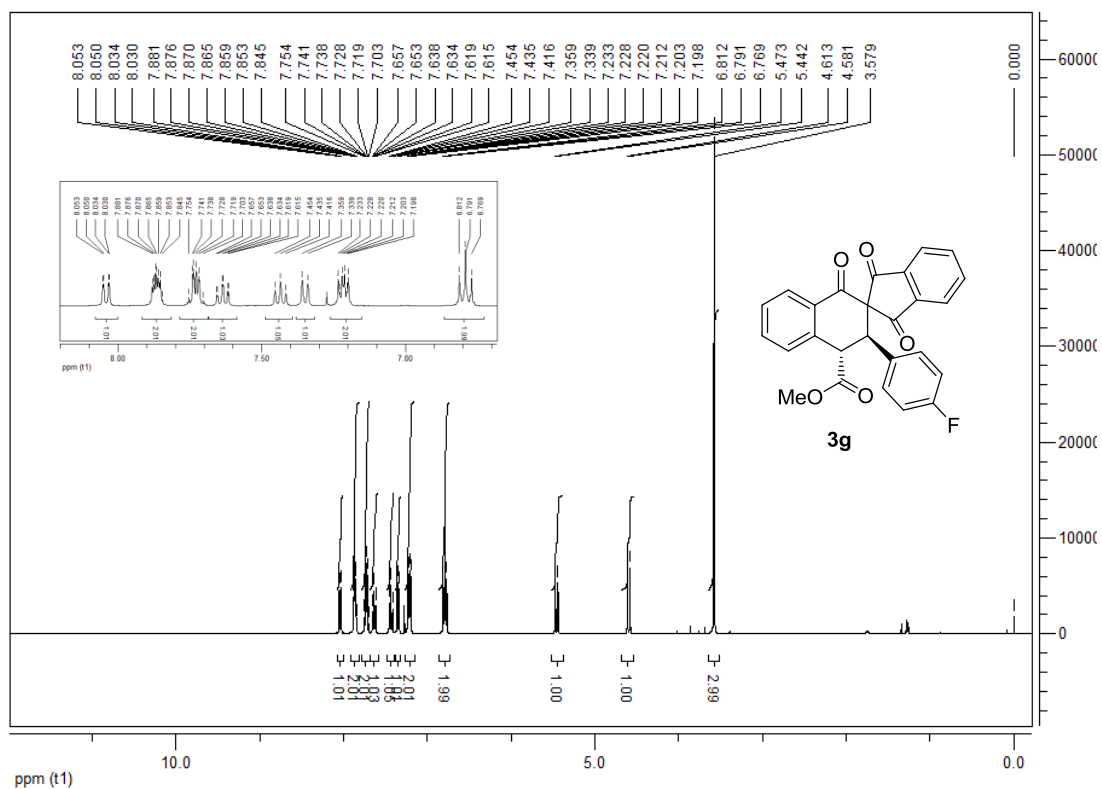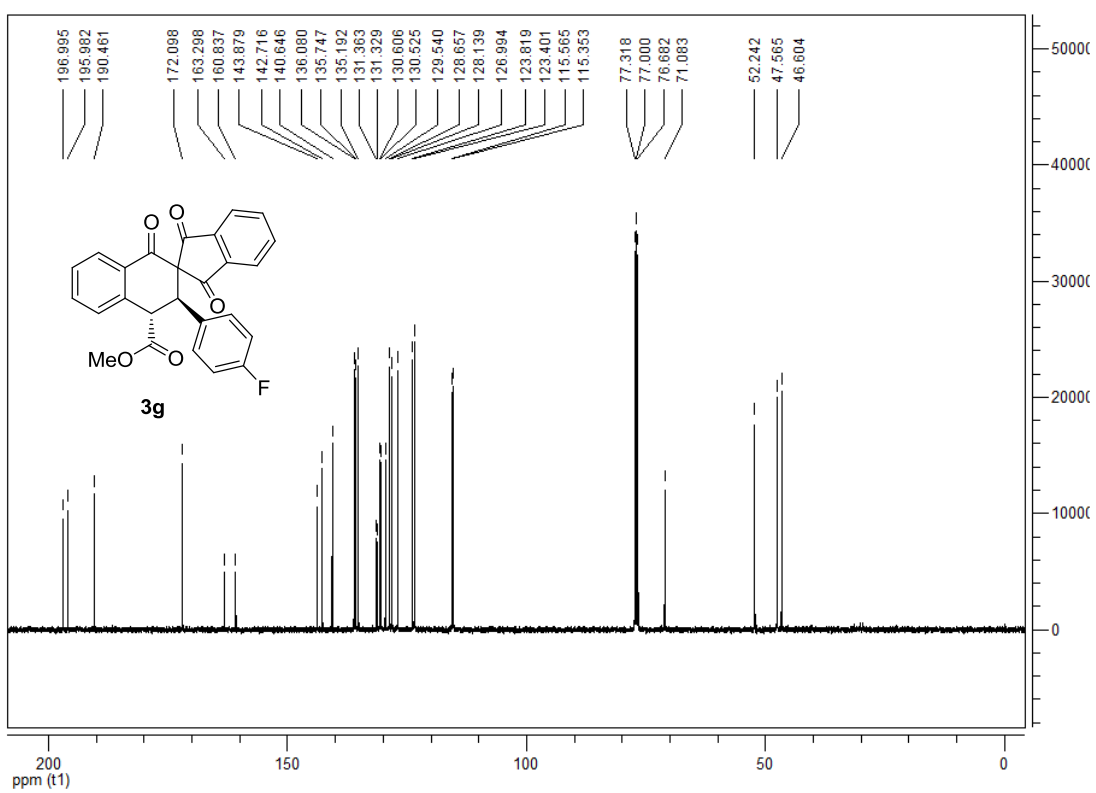



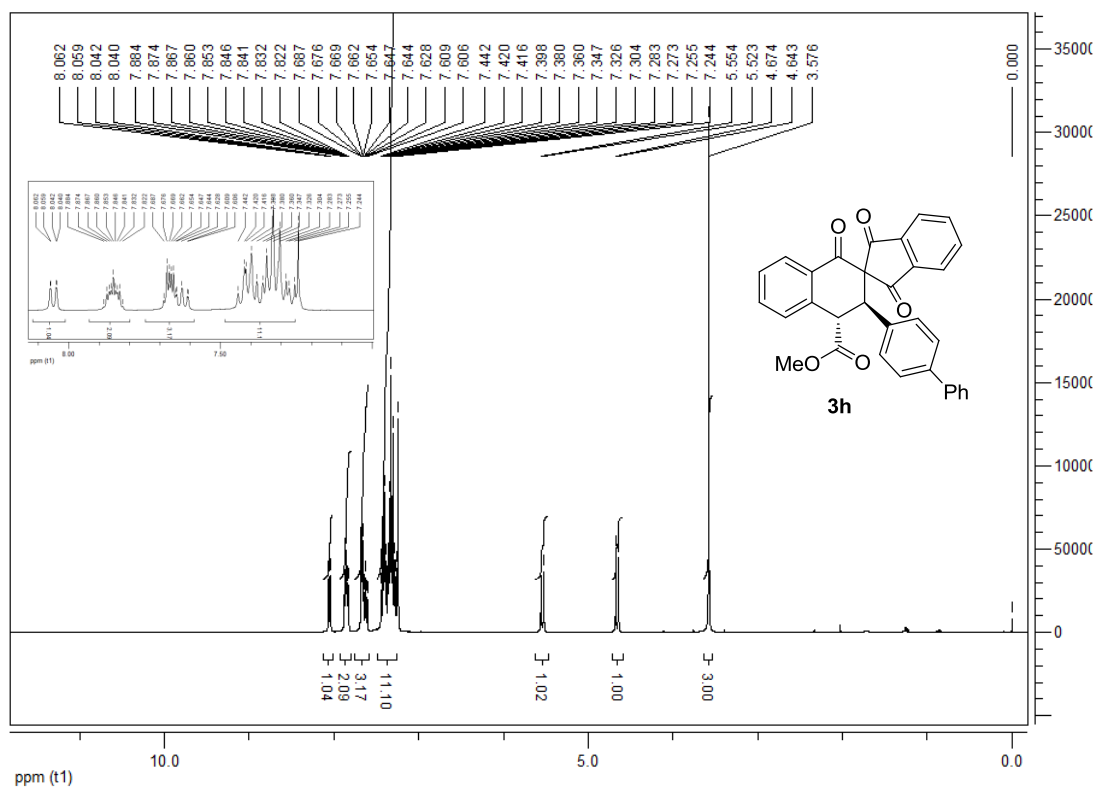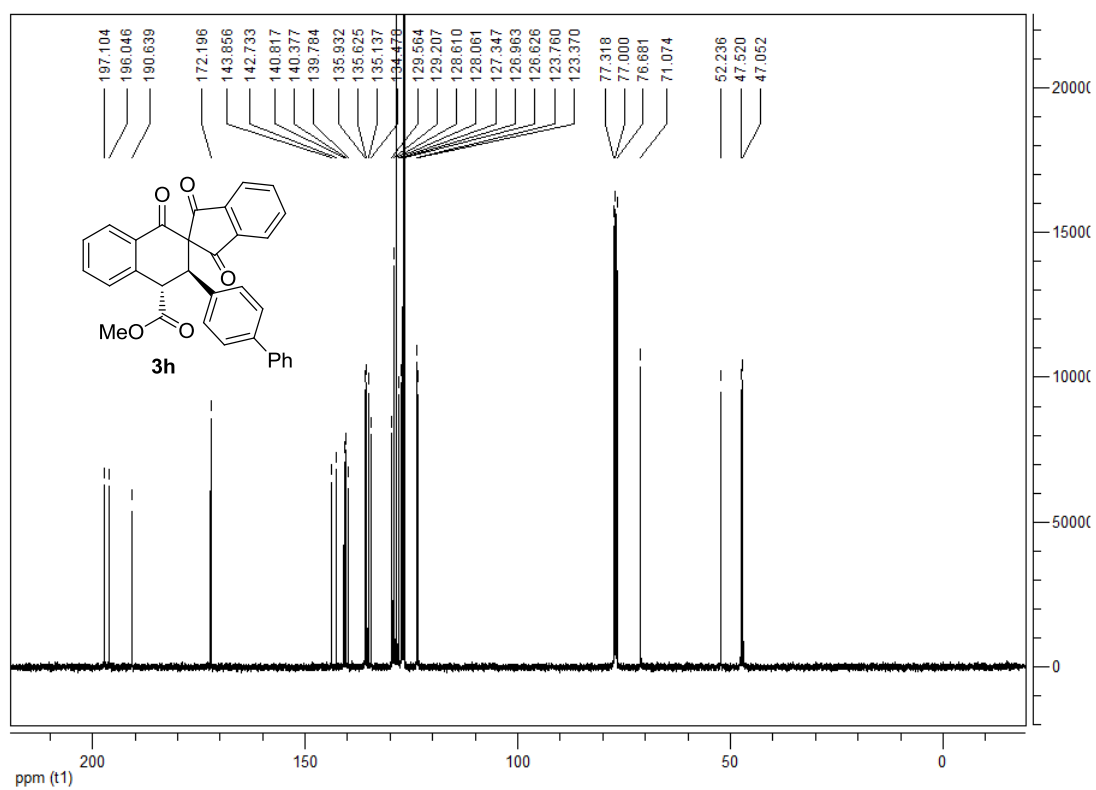

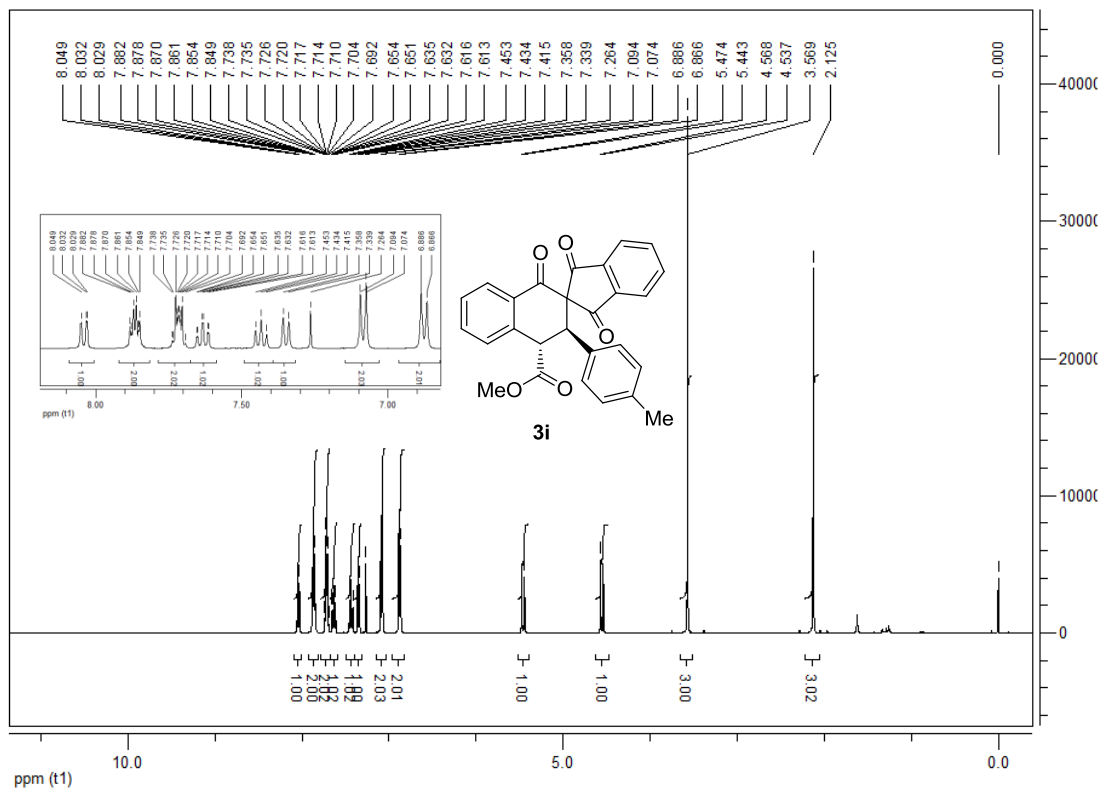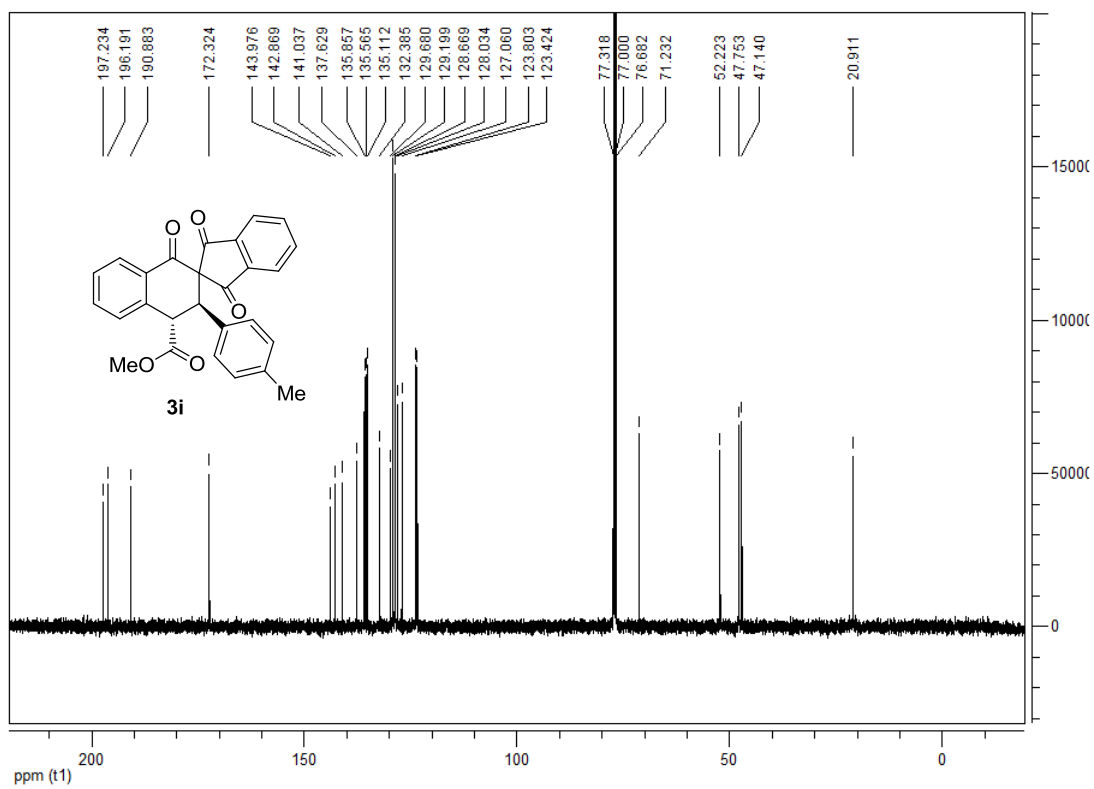

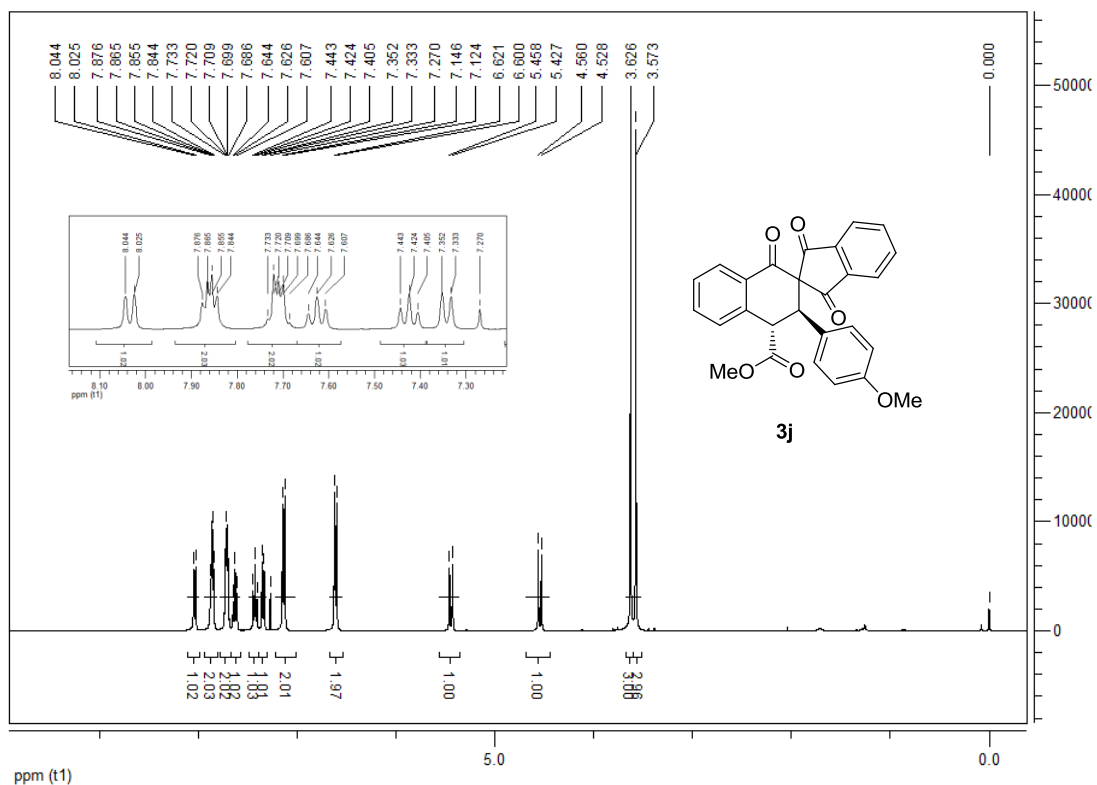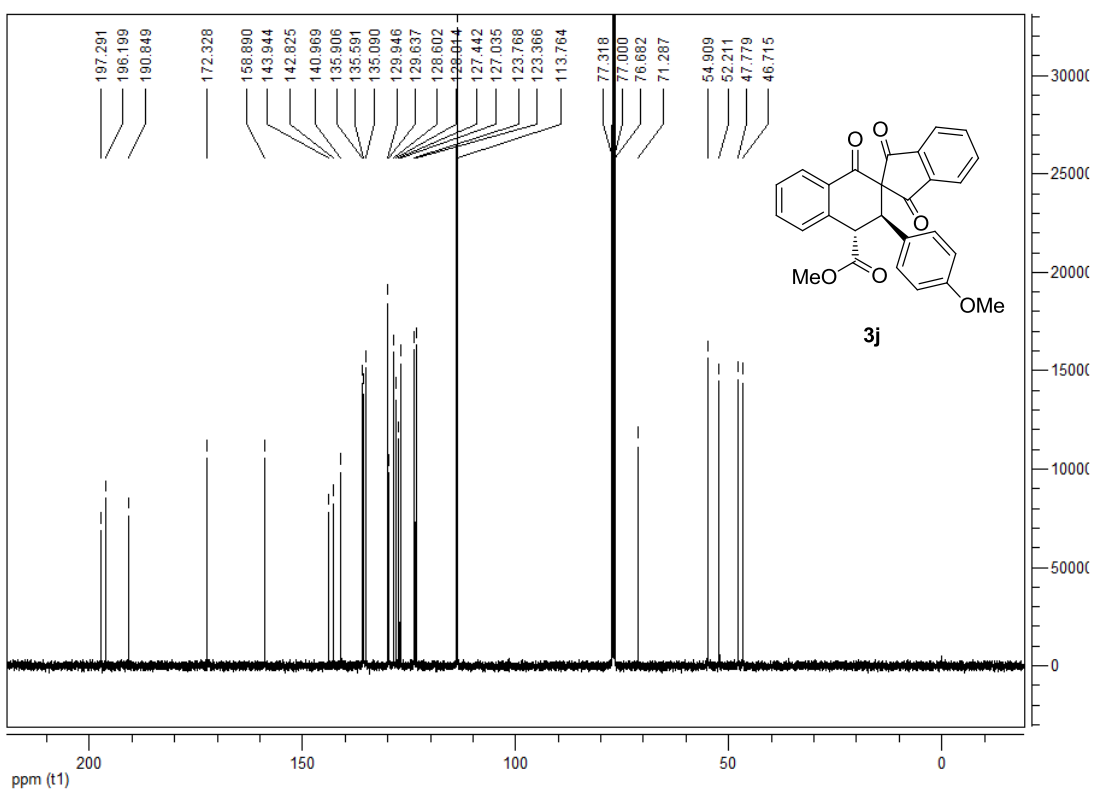

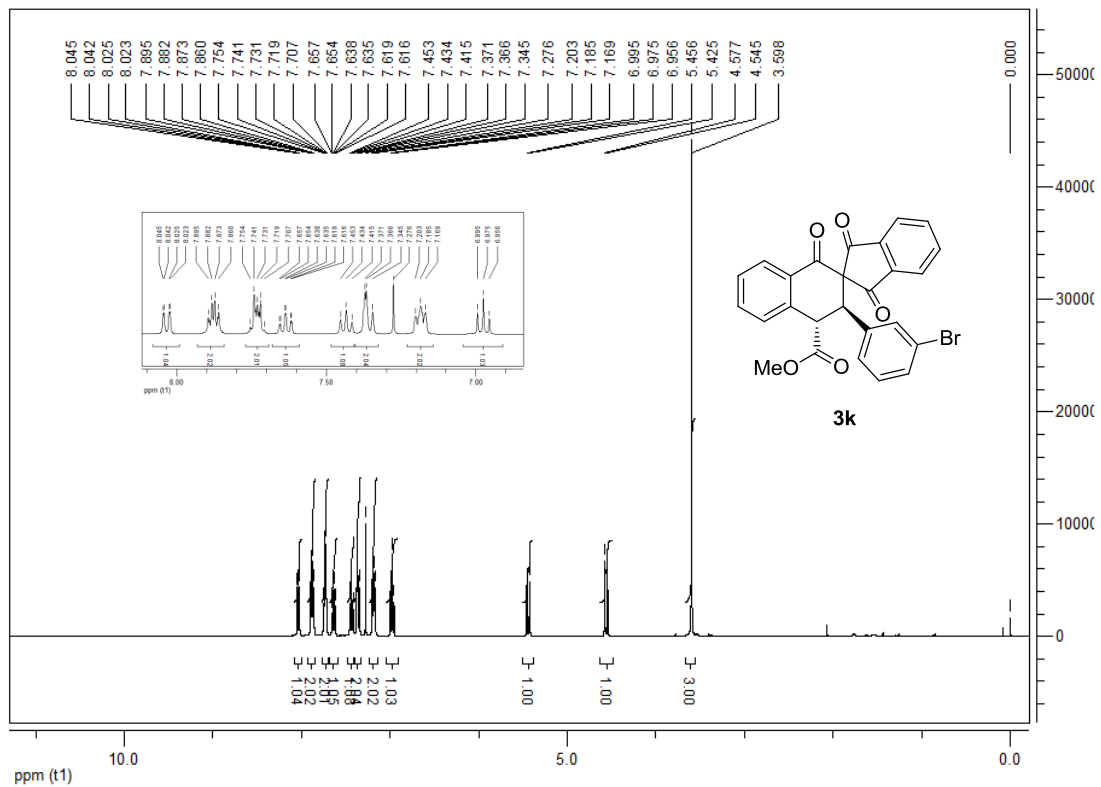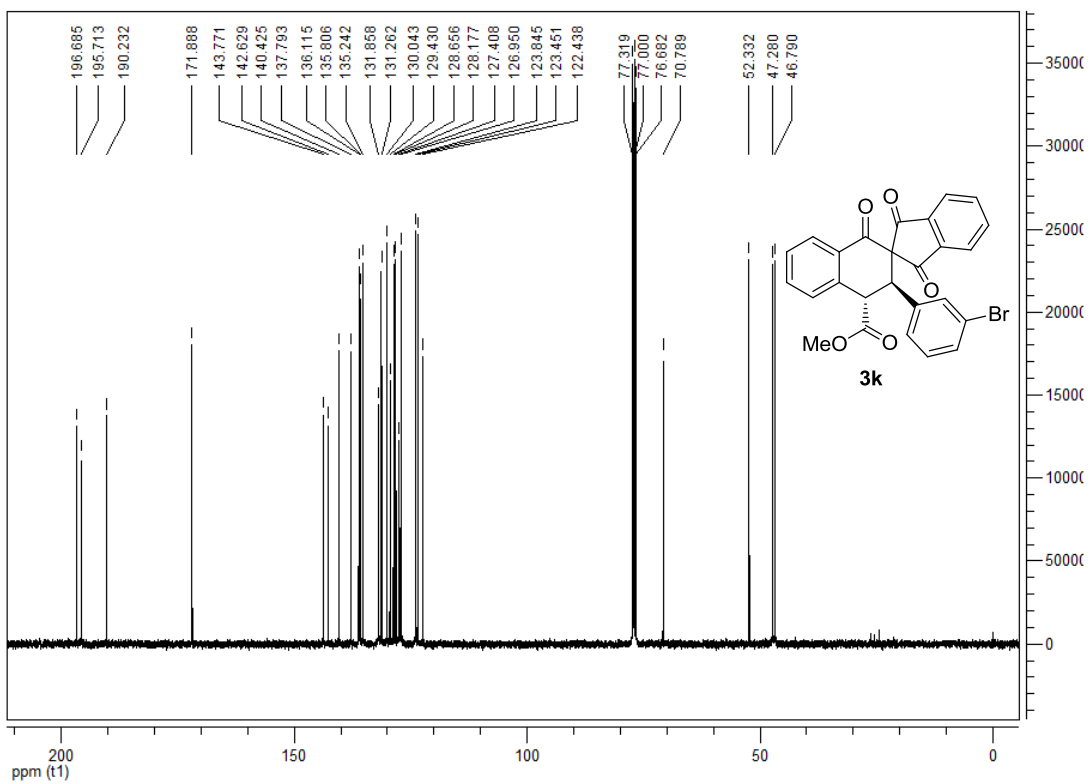

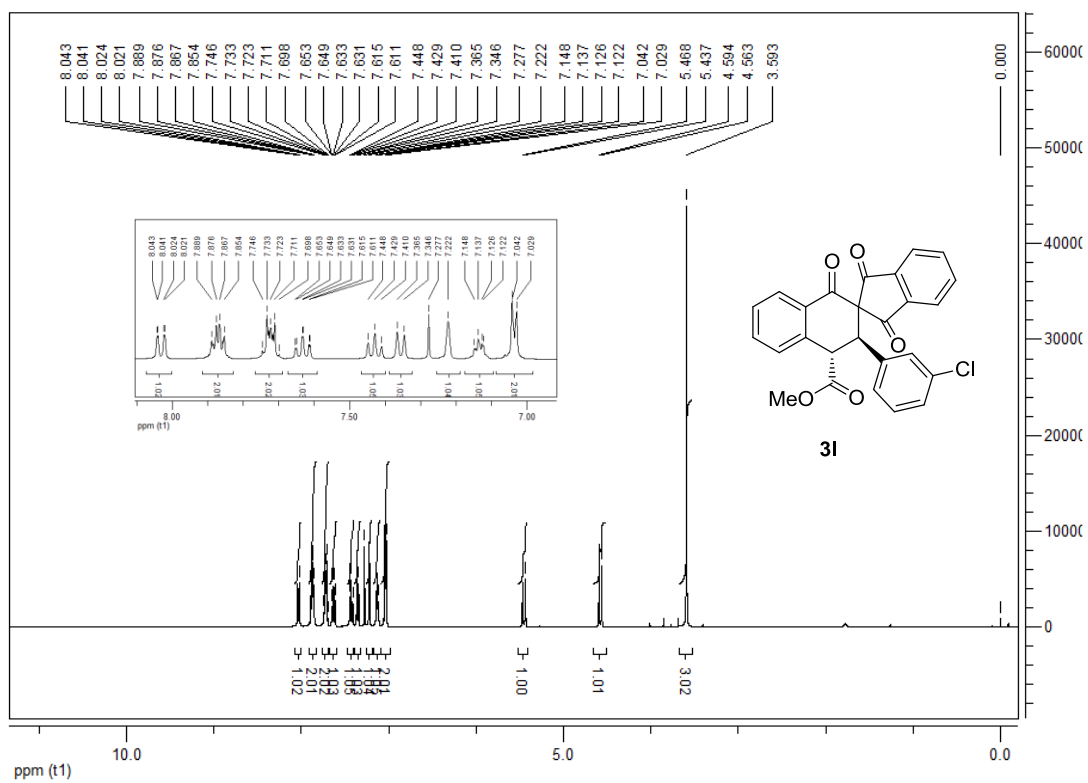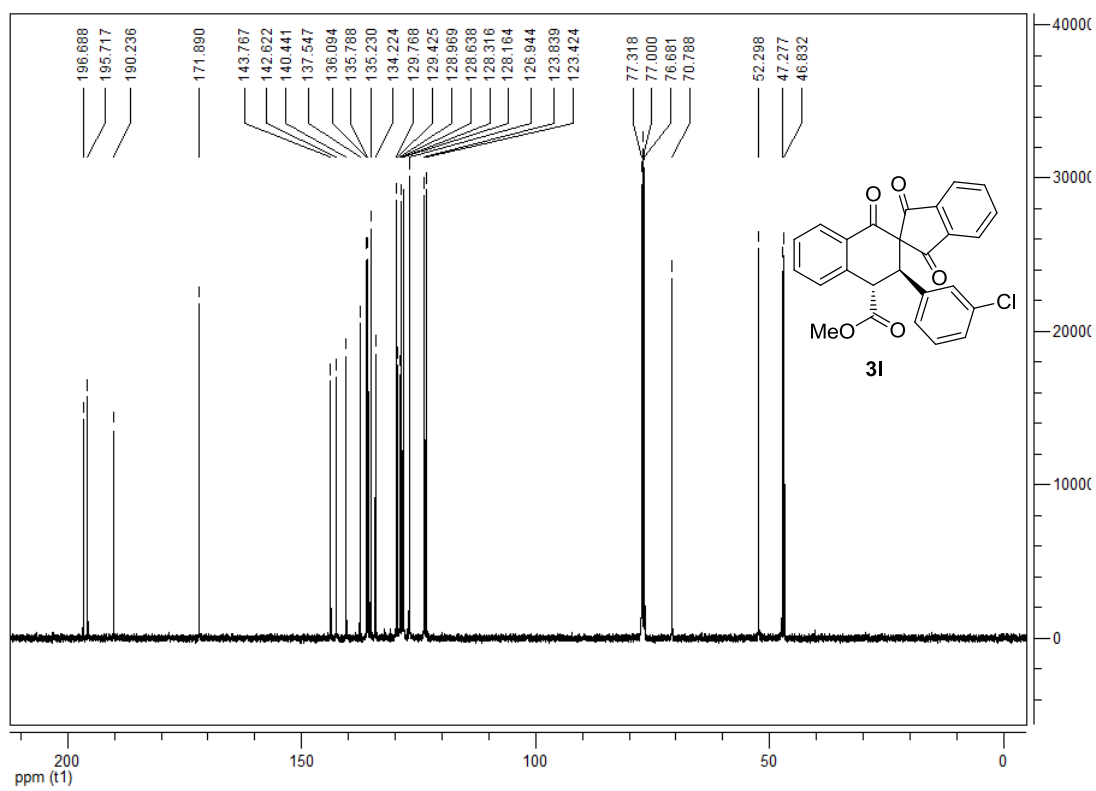



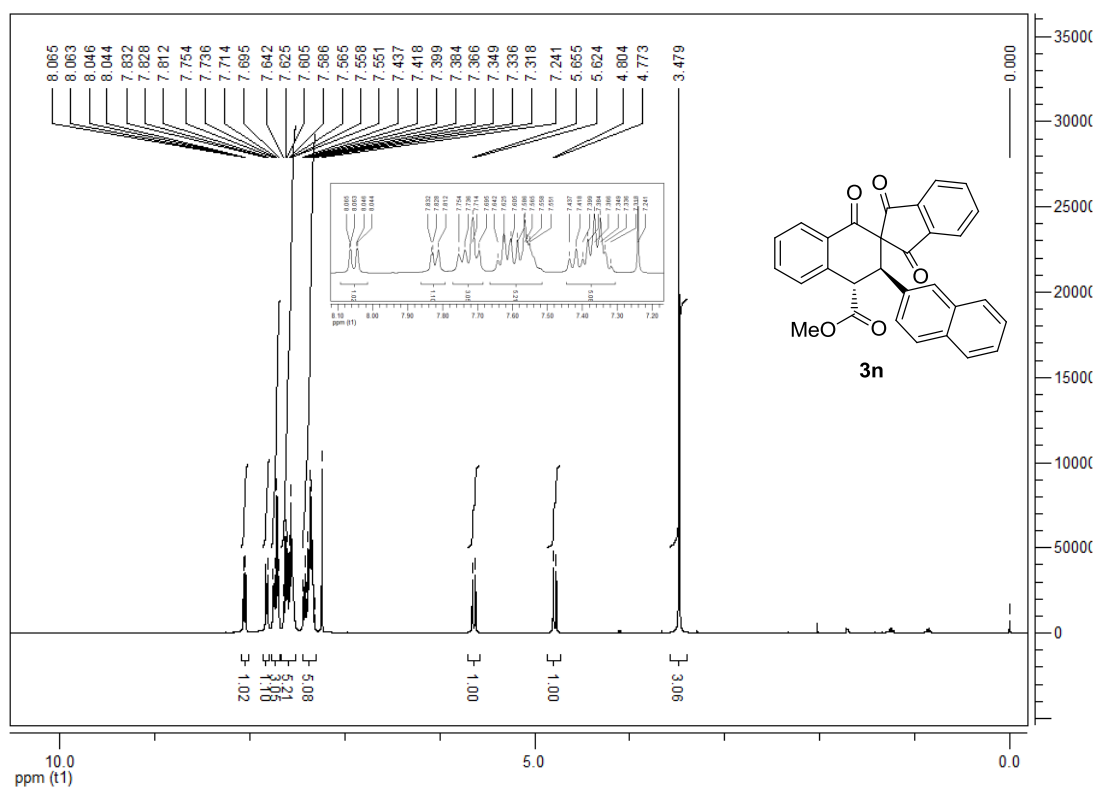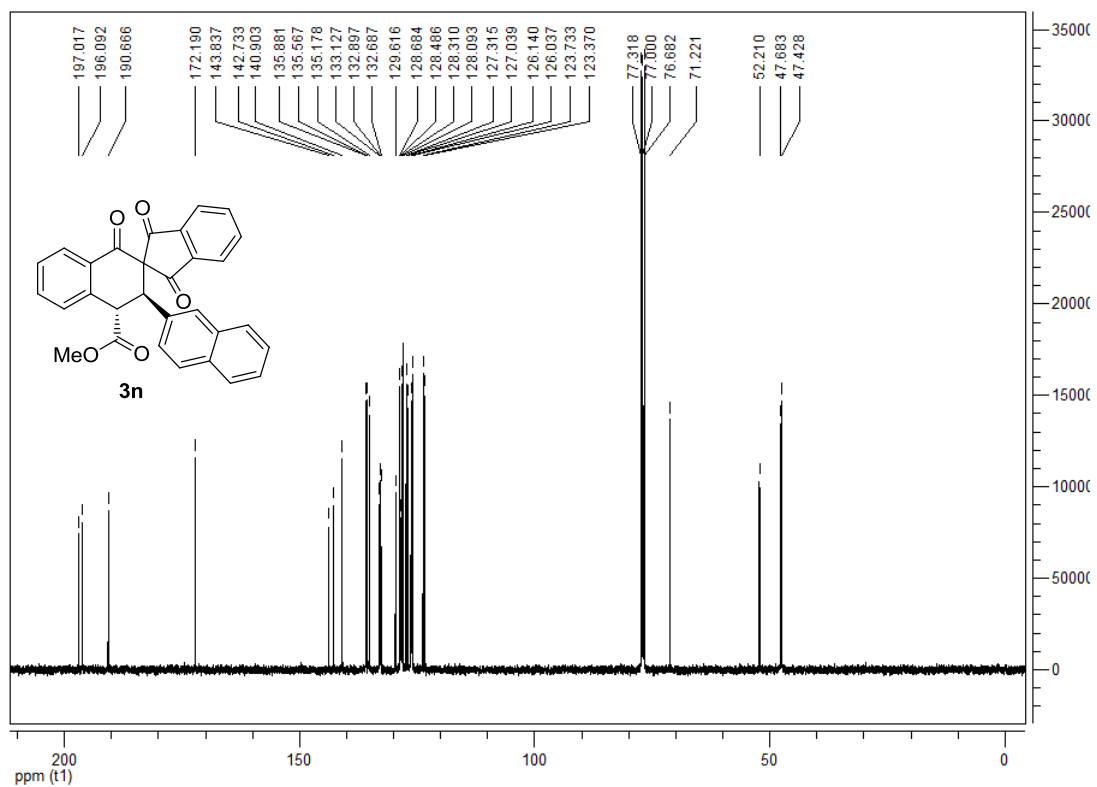

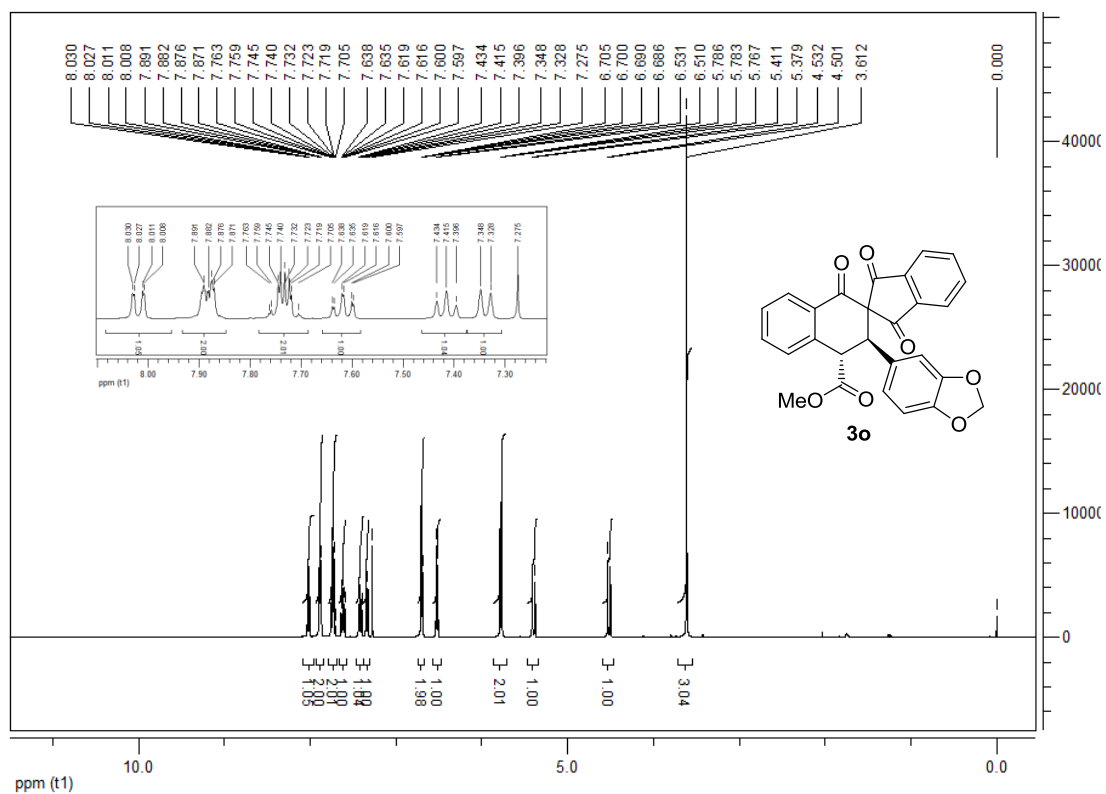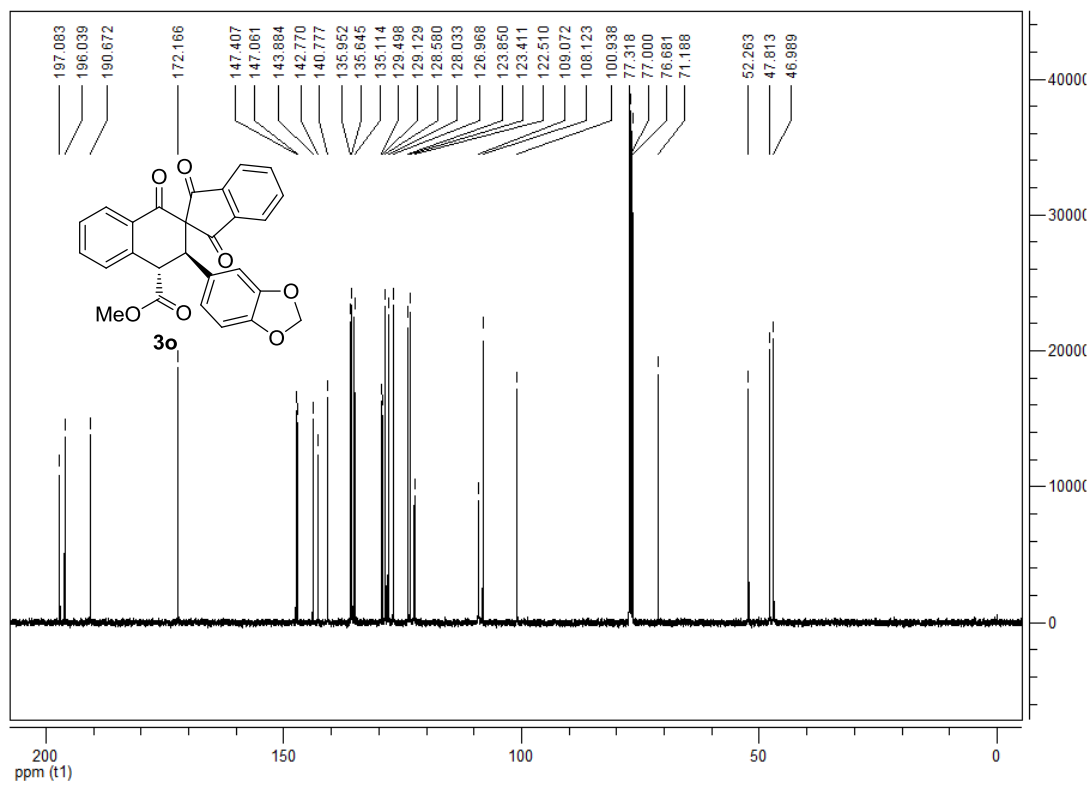



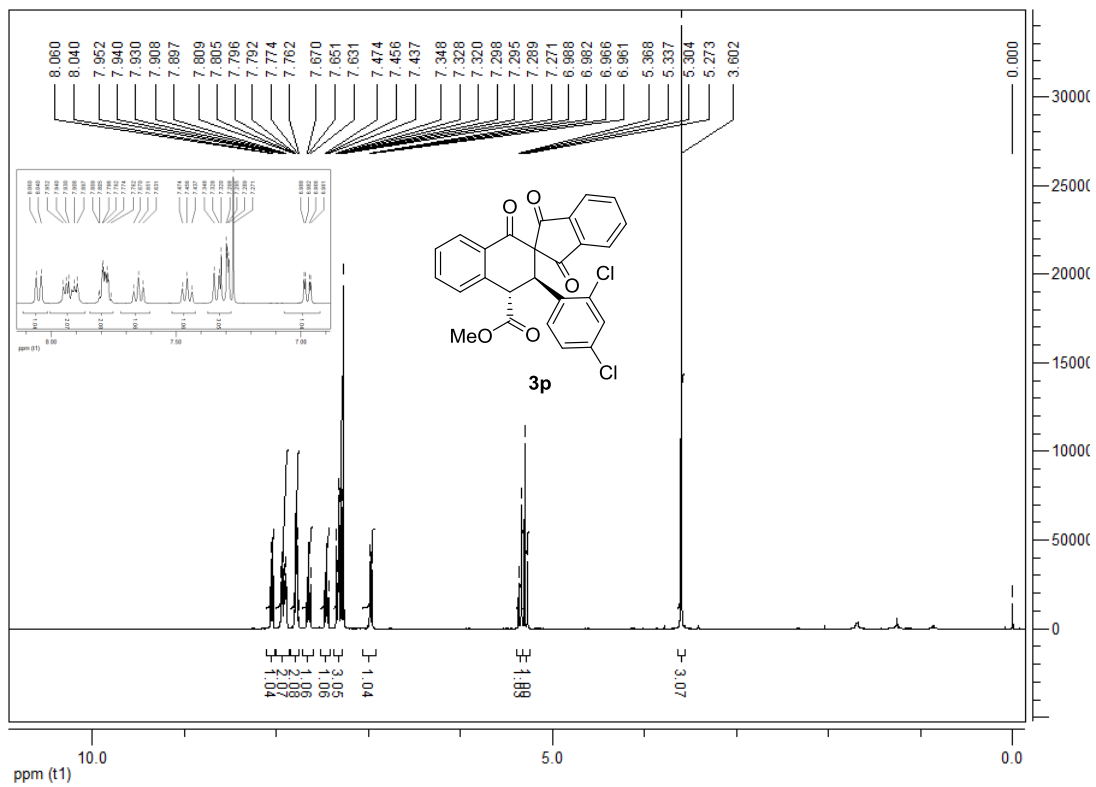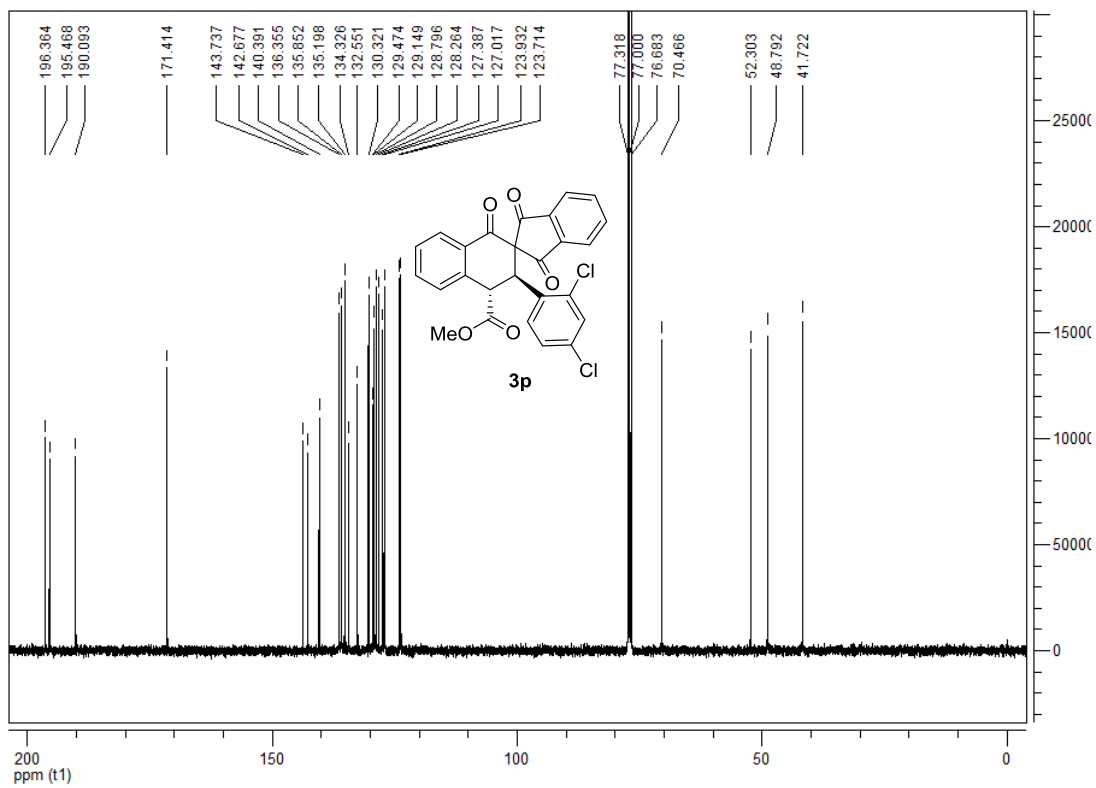

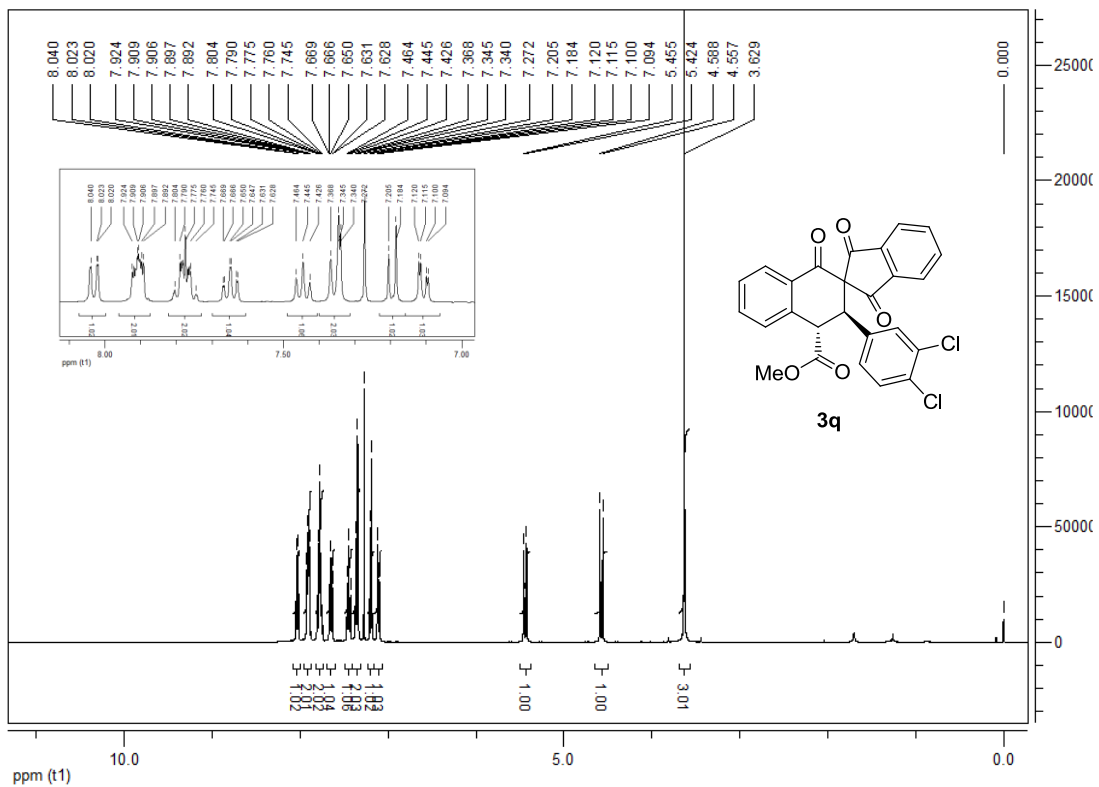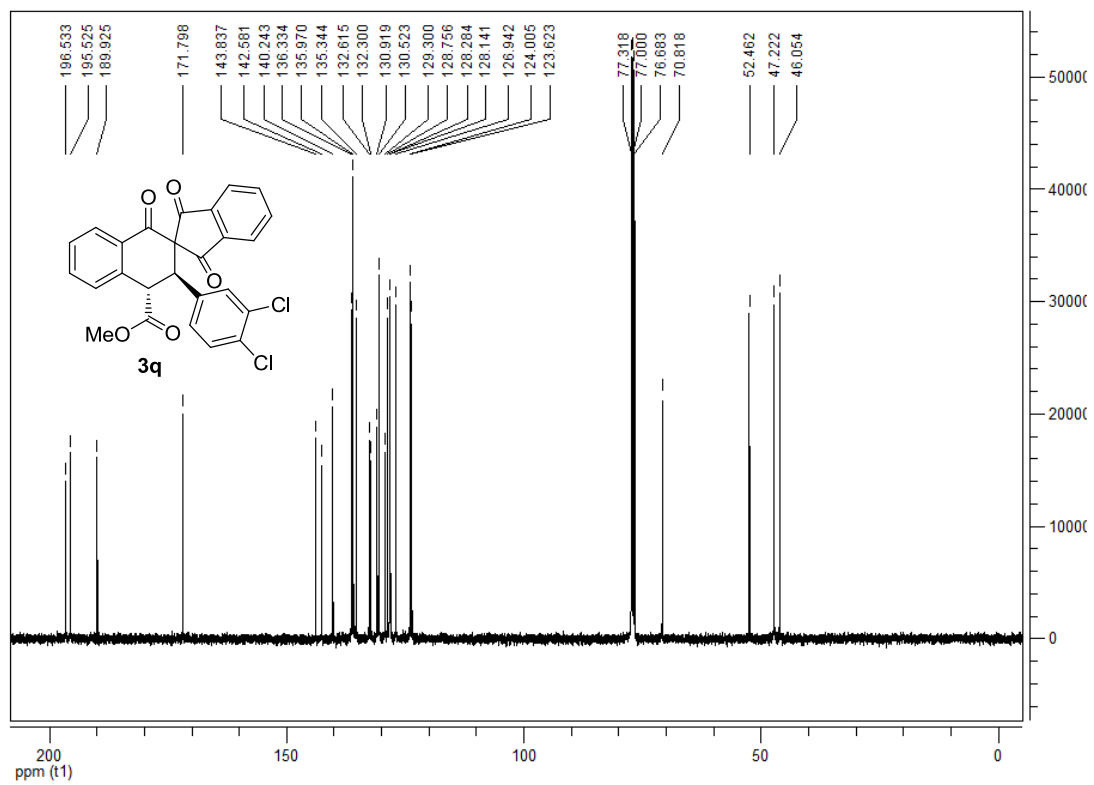

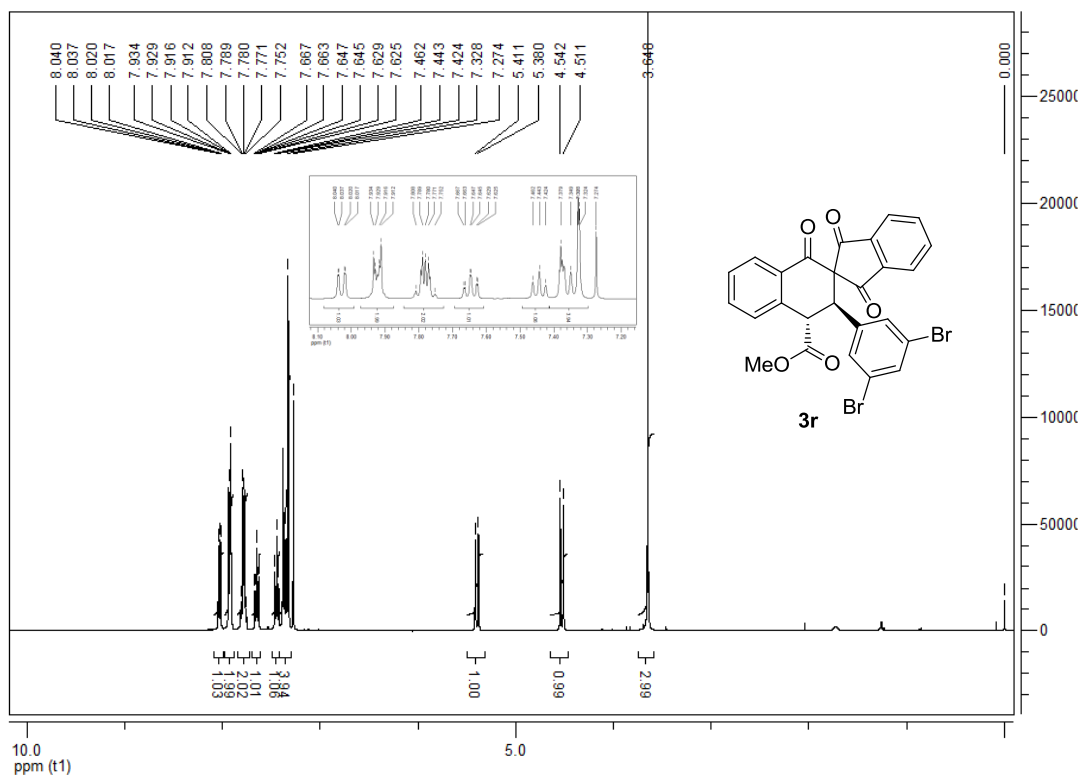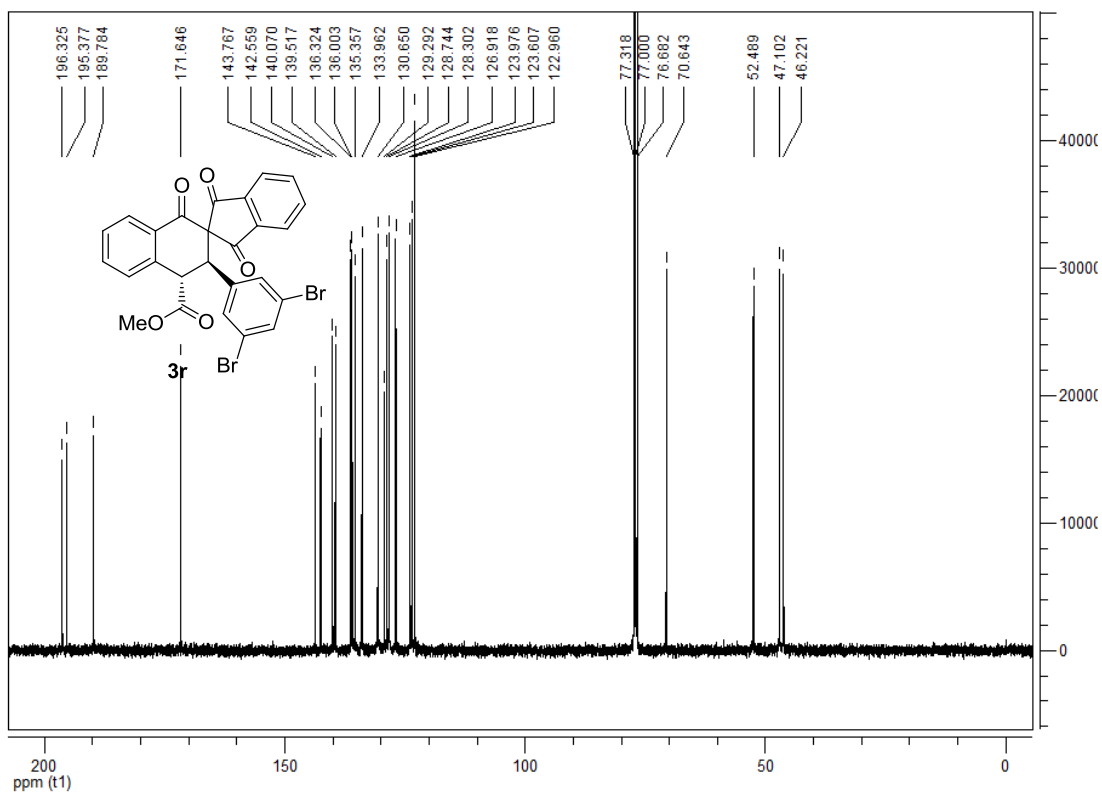

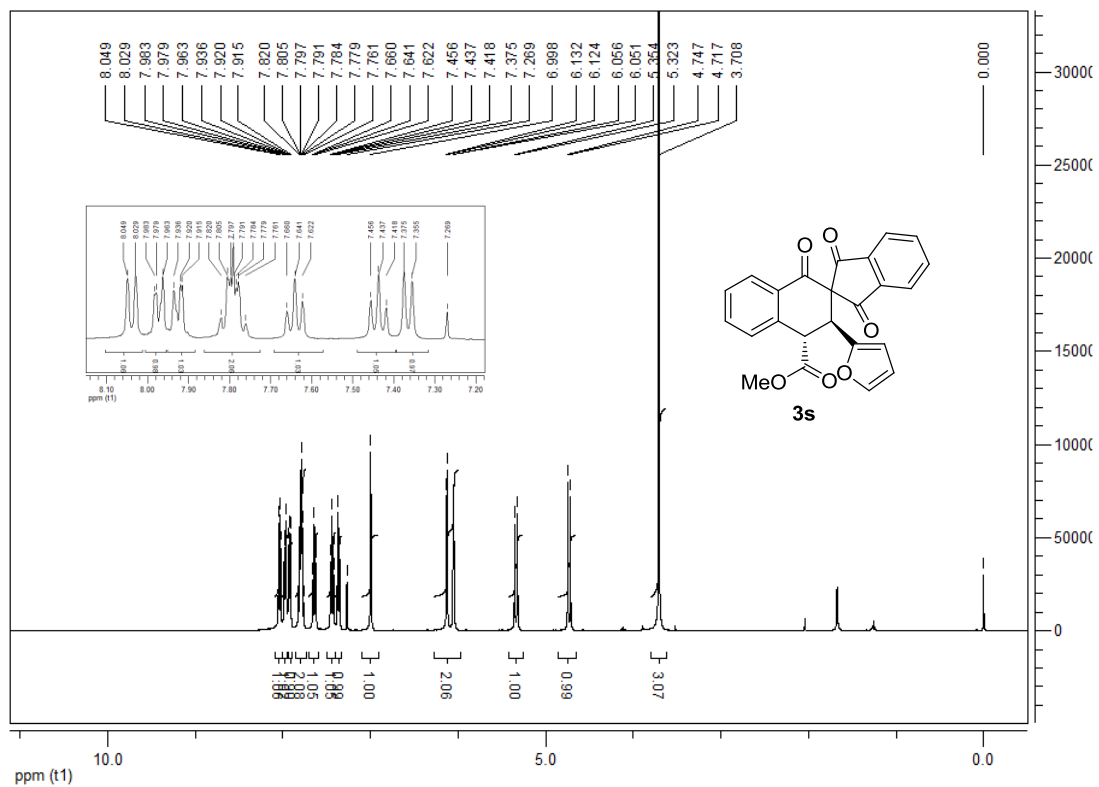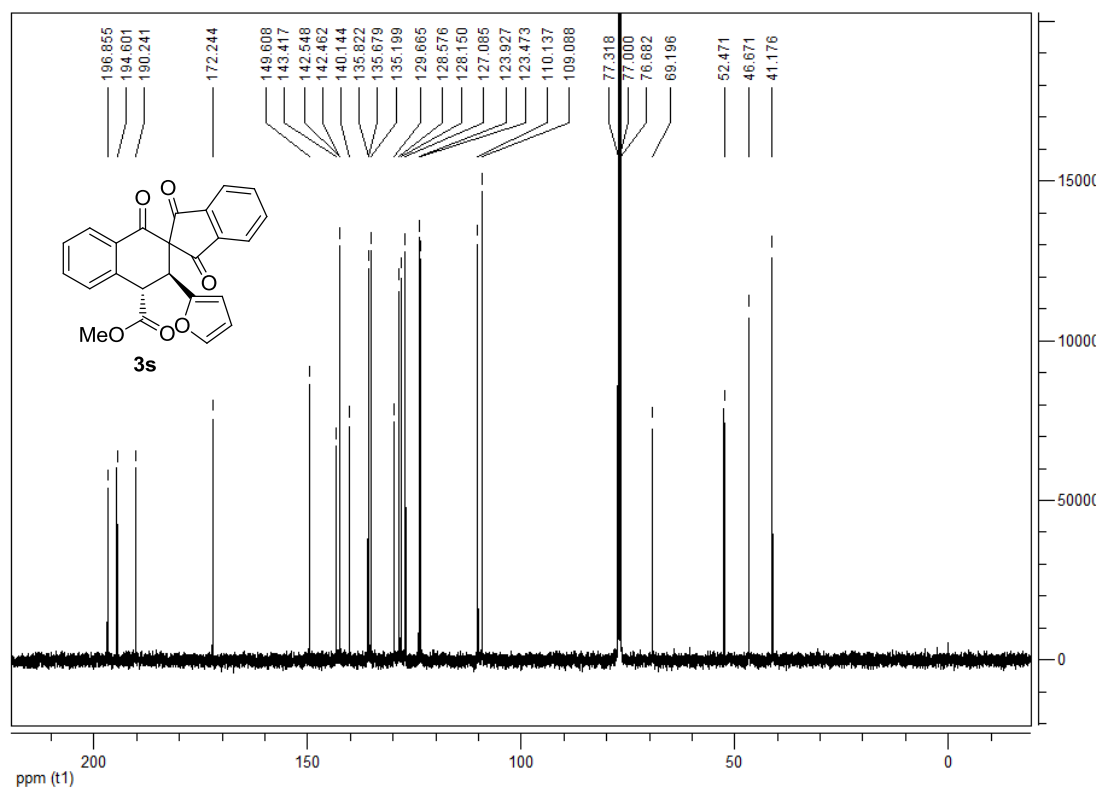

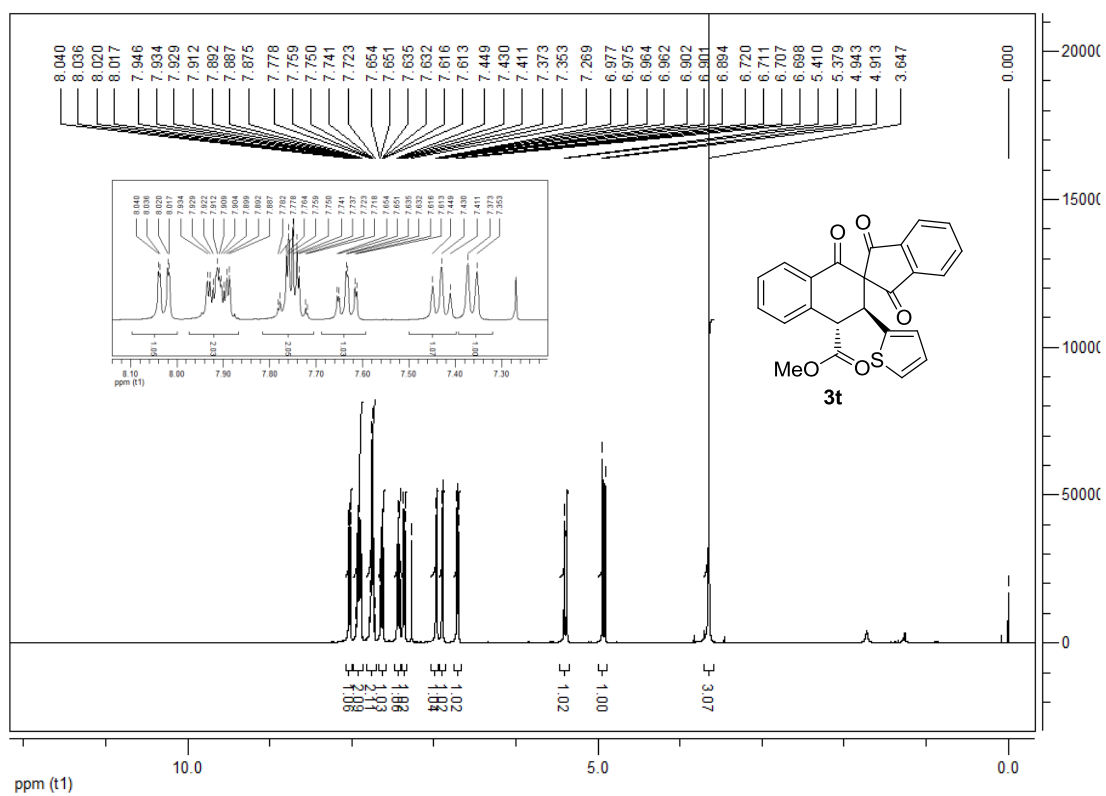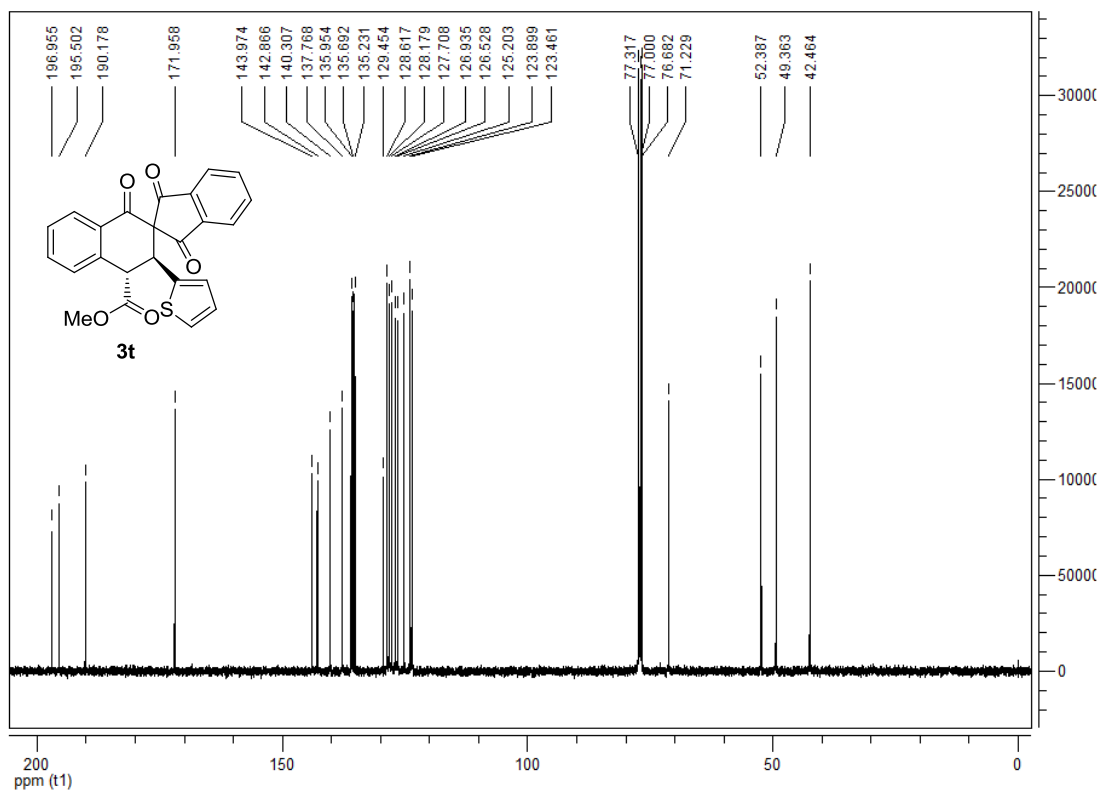

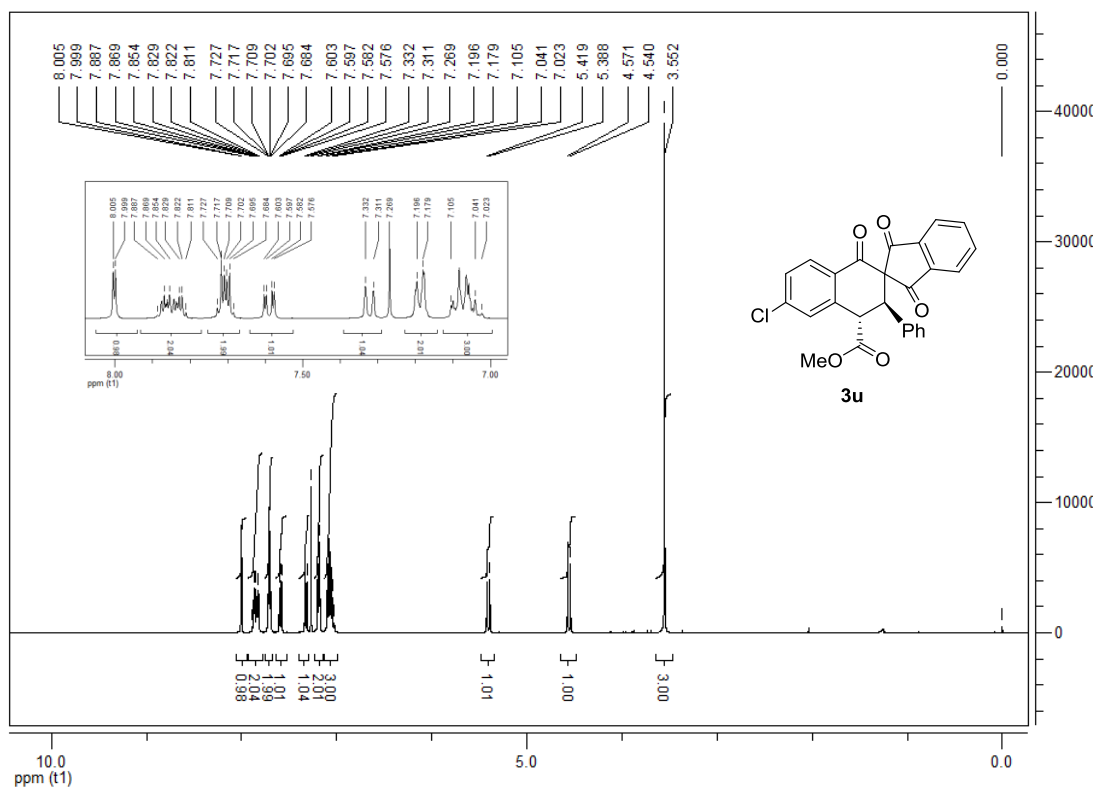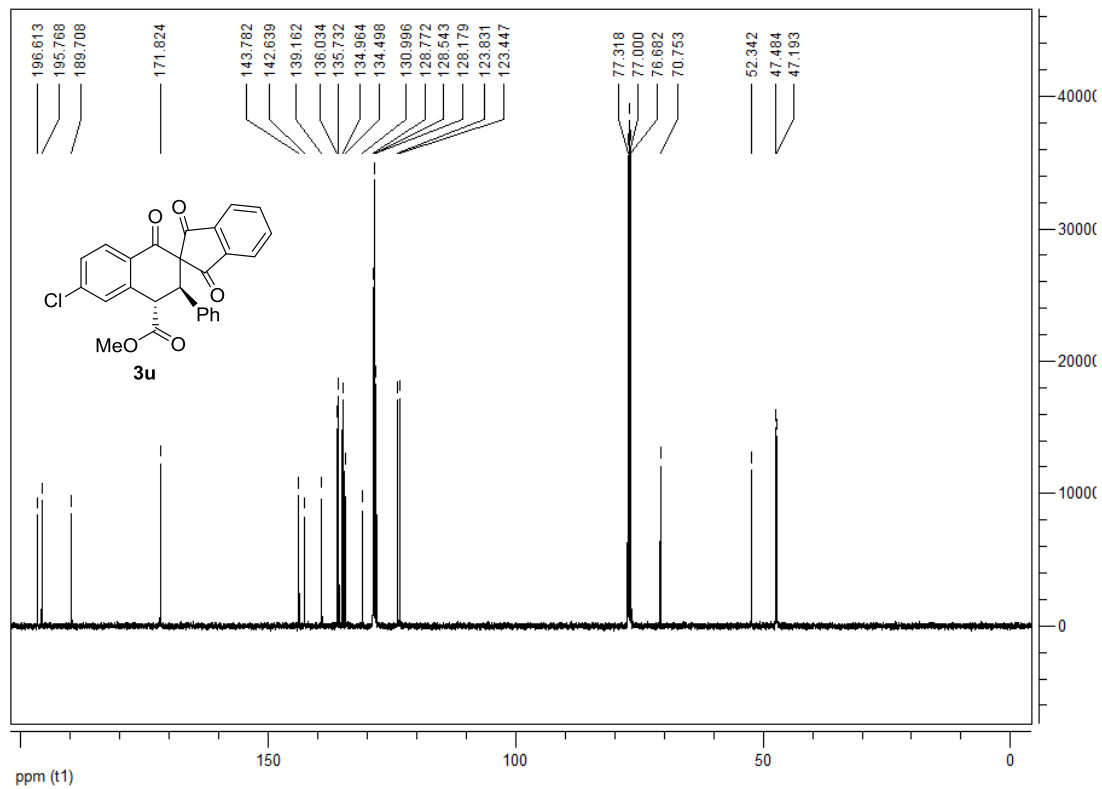

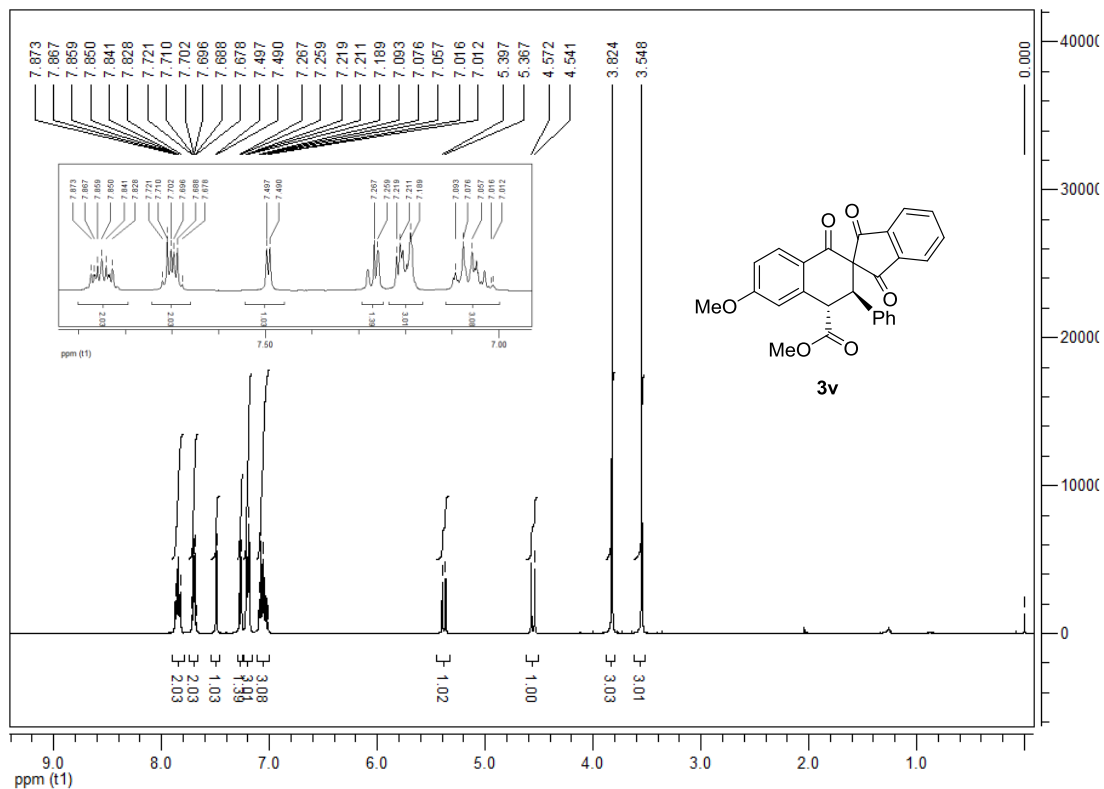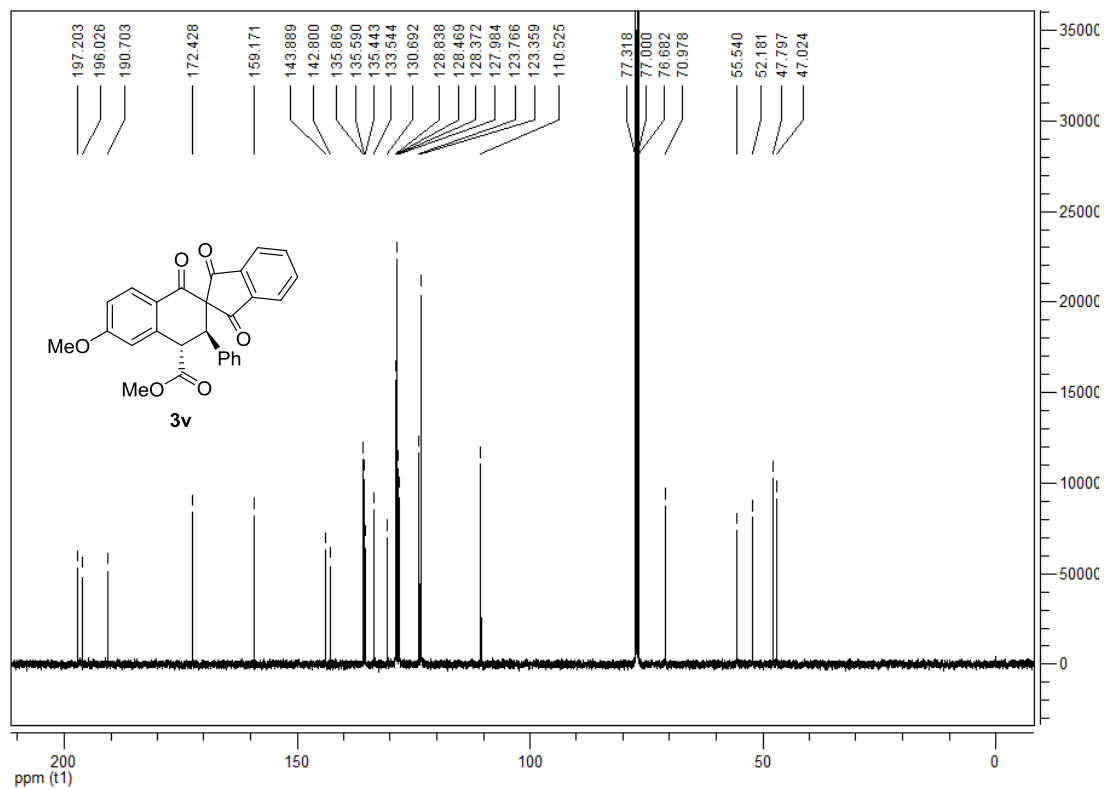

## 2. Copies of HPLC Spectra of the Products

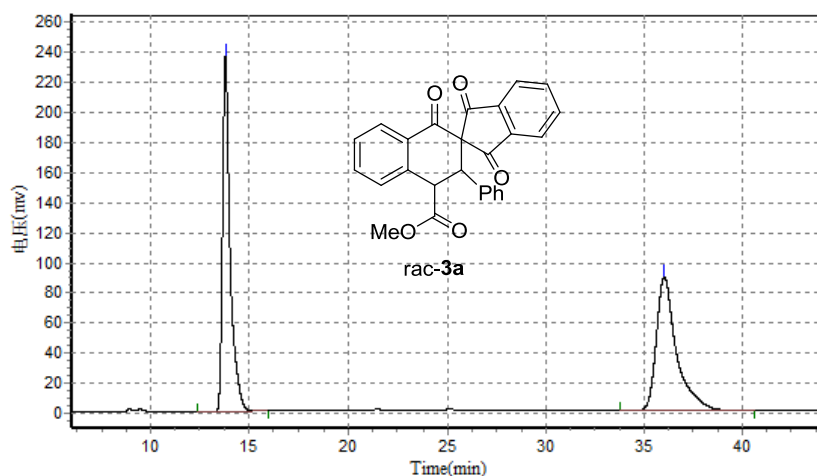

### Results

| Peak No.     | Peak ID | Ret Time | Height     | Area         | Conc.    |
|--------------|---------|----------|------------|--------------|----------|
| 1            |         | 13.785   | 234925.891 | 6264482.000  | 50.0986  |
| 2            |         | 37.028   | 88574.148  | 6239822.500  | 49.9014  |
| <b>Total</b> |         |          | 323500.039 | 12504304.500 | 100.0000 |

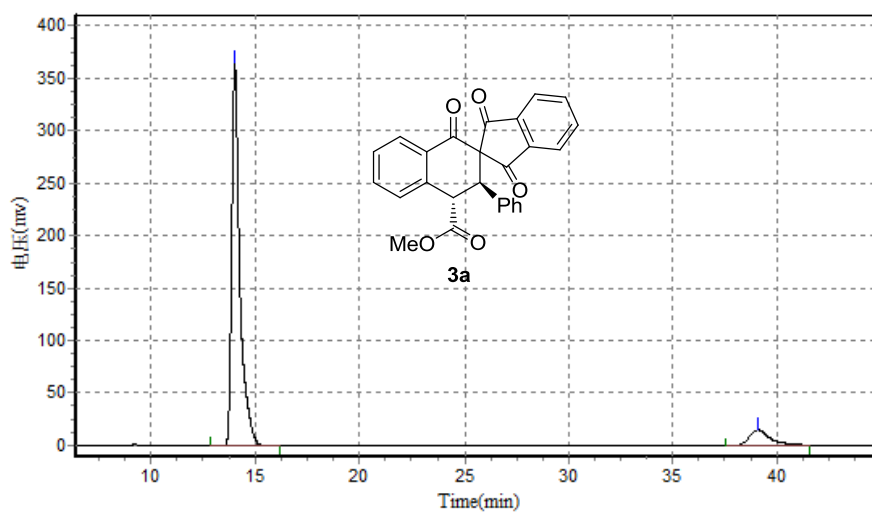

### Results

| Peak No.     | Peak ID | Ret Time | Height     | Area         | Conc.    |
|--------------|---------|----------|------------|--------------|----------|
| 1            |         | 14.032   | 363205.938 | 9808152.000  | 90.1017  |
| 2            |         | 39.068   | 14880.192  | 1077498.250  | 9.8983   |
| <b>Total</b> |         |          | 378086.130 | 10885650.250 | 100.0000 |



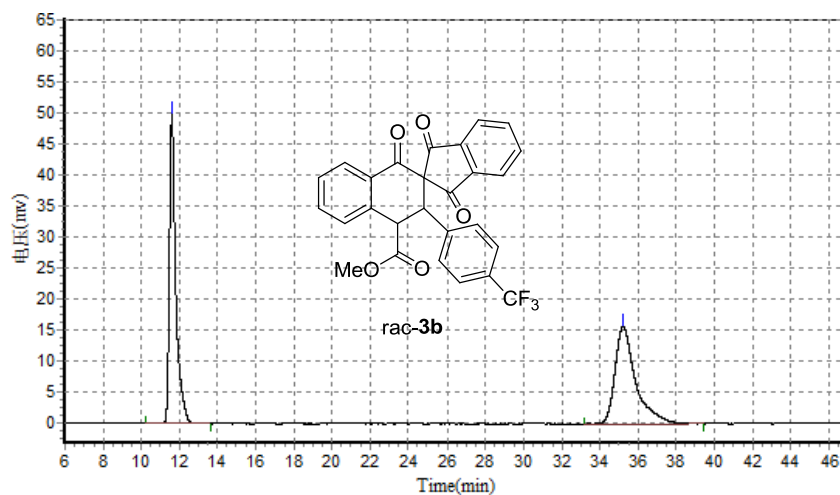

### Results

| Peak No.     | Peak ID | Ret Time | Height    | Area        | Conc.    |
|--------------|---------|----------|-----------|-------------|----------|
| 1            |         | 11.603   | 49802.445 | 1162055.000 | 49.7636  |
| 2            |         | 35.213   | 15746.078 | 1173093.750 | 50.2364  |
| <b>Total</b> |         |          | 65548.523 | 2335148.750 | 100.0000 |

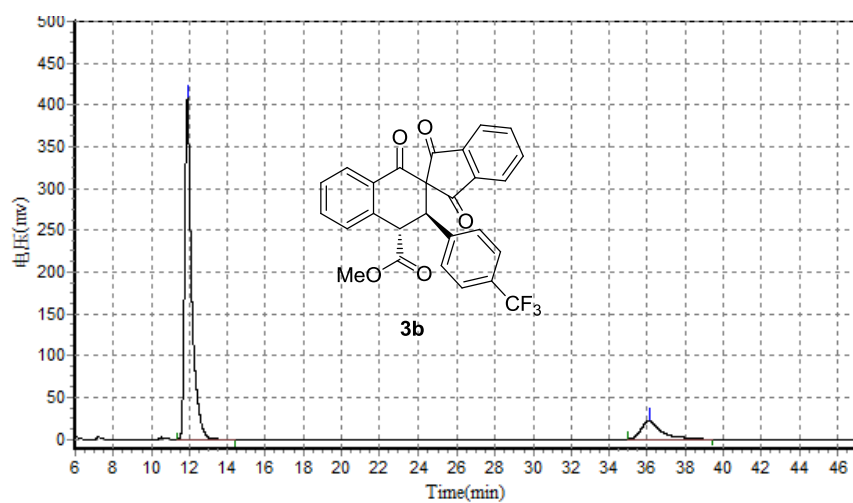

### Results

| Peak No.     | Peak ID | Ret Time | Height     | Area         | Conc.    |
|--------------|---------|----------|------------|--------------|----------|
| 1            |         | 11.888   | 407253.406 | 10411565.000 | 87.9658  |
| 2            |         | 36.107   | 20937.467  | 1424358.375  | 12.0342  |
| <b>Total</b> |         |          | 428190.873 | 11835923.375 | 100.0000 |

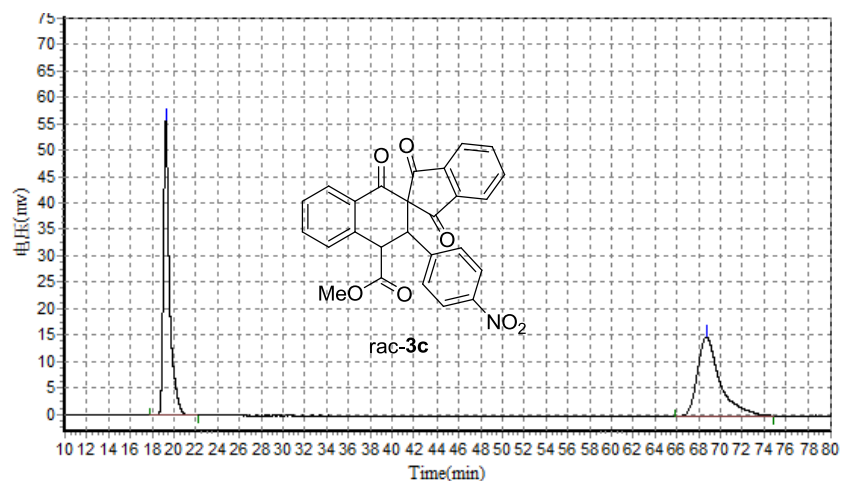

### Results

| Peak No.     | Peak ID | Ret Time | Height    | Area        | Conc.    |
|--------------|---------|----------|-----------|-------------|----------|
| 1            |         | 19.242   | 55791.668 | 2169731.250 | 50.2956  |
| 2            |         | 68.697   | 15111.603 | 2144227.500 | 49.7044  |
| <b>Total</b> |         |          | 70903.271 | 4313958.750 | 100.0000 |

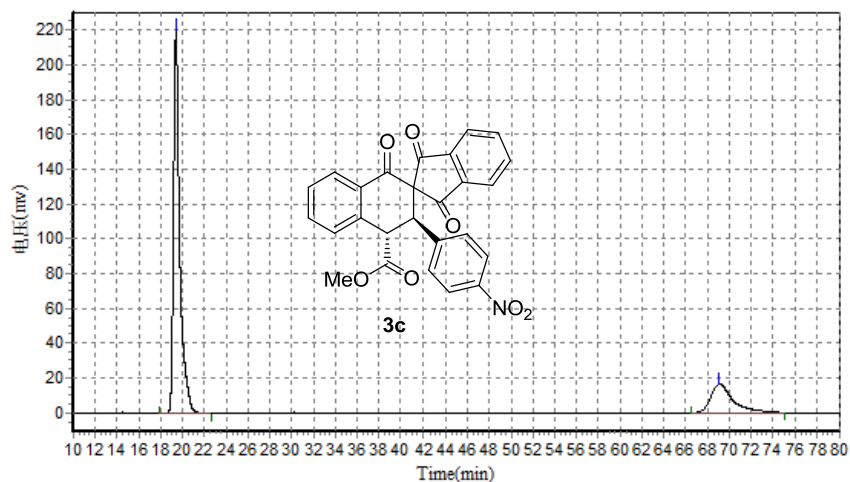

### Results

| Peak No.     | Peak ID | Ret Time | Height     | Area         | Conc.    |
|--------------|---------|----------|------------|--------------|----------|
| 1            |         | 19.390   | 219065.922 | 8652199.000  | 79.8809  |
| 2            |         | 69.087   | 16255.794  | 2179180.750  | 20.1191  |
| <b>Total</b> |         |          | 235321.716 | 10831379.750 | 100.0000 |

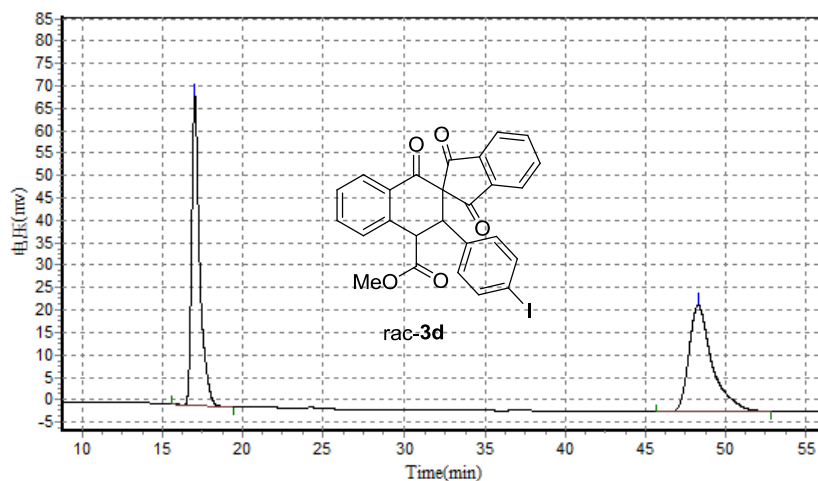

### Results

| Peak No.     | Peak ID | Ret Time | Height    | Area        | Conc.    |
|--------------|---------|----------|-----------|-------------|----------|
| 1            |         | 16.992   | 69001.328 | 2399230.500 | 50.1751  |
| 2            |         | 48.255   | 23740.859 | 2382488.250 | 49.8249  |
| <b>Total</b> |         |          | 92742.188 | 4781718.750 | 100.0000 |

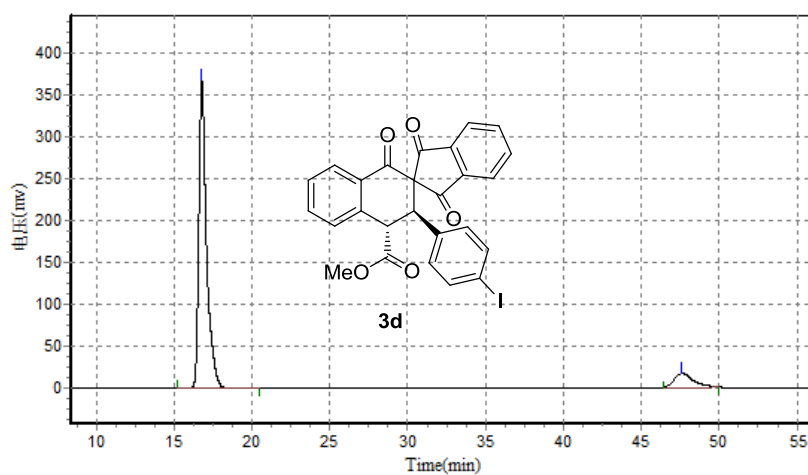

### Results

| Peak No.     | Peak ID | Ret Time | Height     | Area         | Conc.    |
|--------------|---------|----------|------------|--------------|----------|
| 1            |         | 16.795   | 365810.563 | 12652640.000 | 89.6596  |
| 2            |         | 47.588   | 16700.760  | 1459225.375  | 10.3404  |
| <b>Total</b> |         |          | 382511.322 | 14111865.375 | 100.0000 |

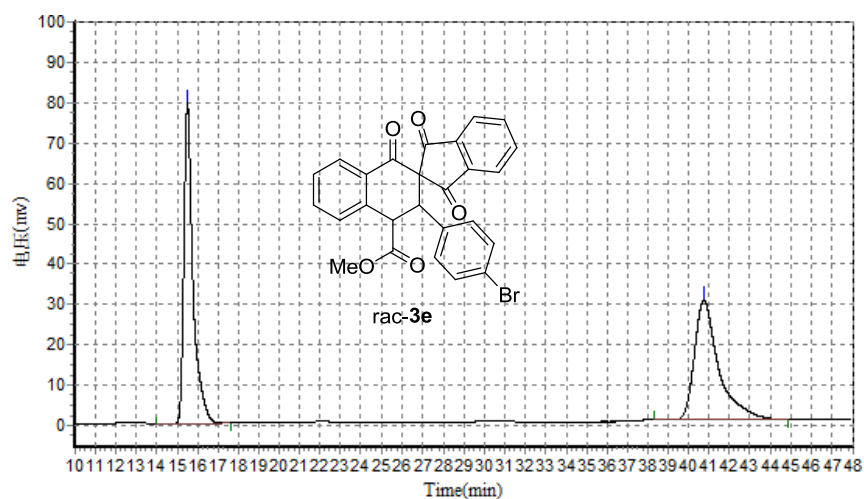

### Results

| Peak No.     | Peak ID | Ret Time | Height     | Area        | Conc.    |
|--------------|---------|----------|------------|-------------|----------|
| 1            |         | 15.500   | 79406.125  | 2447675.250 | 50.0397  |
| 2            |         | 40.747   | 29628.045  | 2443791.500 | 49.9603  |
| <b>Total</b> |         |          | 109034.170 | 4891466.750 | 100.0000 |

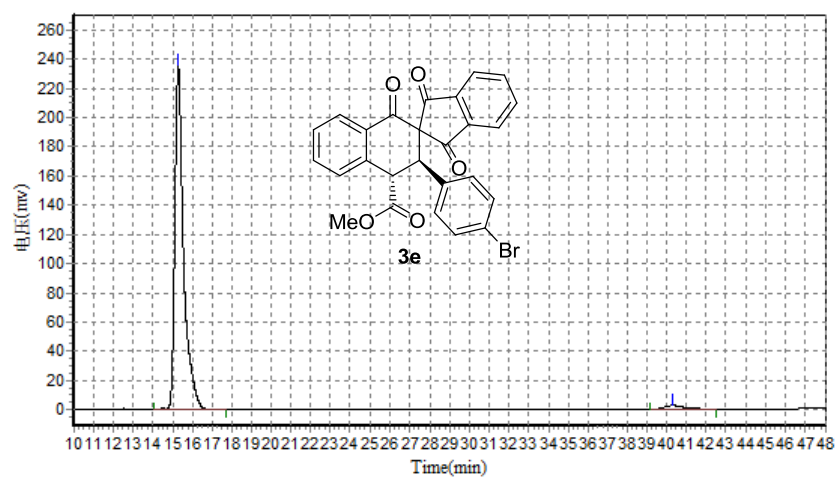

### Results

| Peak No.     | Peak ID | Ret Time | Height     | Area        | Conc.    |
|--------------|---------|----------|------------|-------------|----------|
| 1            |         | 15.280   | 234500.578 | 7268099.500 | 97.4306  |
| 2            |         | 40.318   | 2577.626   | 191672.906  | 2.5694   |
| <b>Total</b> |         |          | 237078.204 | 7459772.406 | 100.0000 |

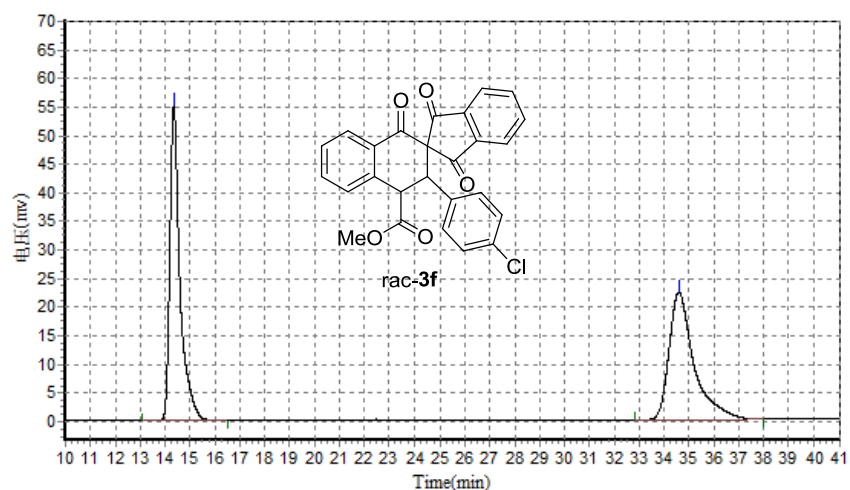

### Results

| Peak No.     | Peak ID | Ret Time | Height    | Area        | Conc.    |
|--------------|---------|----------|-----------|-------------|----------|
| 1            |         | 14.348   | 54913.785 | 1543037.375 | 49.9484  |
| 2            |         | 34.587   | 22289.498 | 1546226.750 | 50.0516  |
| <b>Total</b> |         |          | 77203.283 | 3089264.125 | 100.0000 |

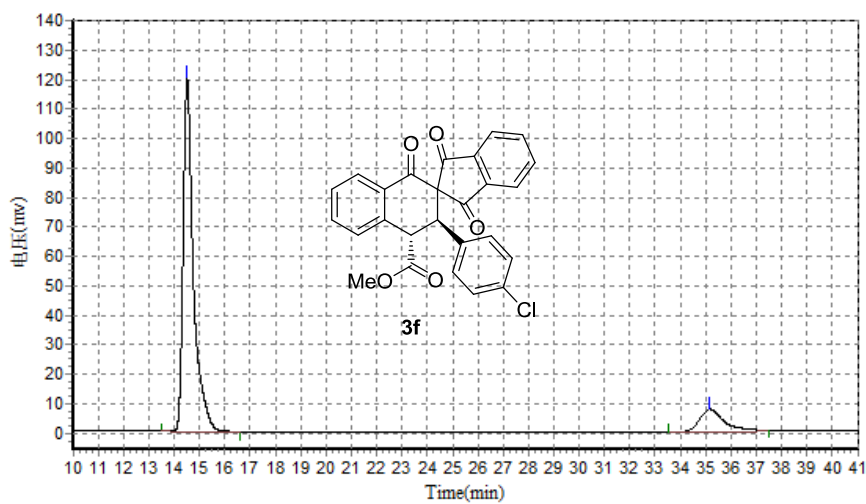

### Results

| Peak No.     | Peak ID | Ret Time | Height     | Area        | Conc.    |
|--------------|---------|----------|------------|-------------|----------|
| 1            |         | 14.503   | 119437.602 | 3363848.250 | 87.6387  |
| 2            |         | 35.147   | 7414.307   | 474465.688  | 12.3613  |
| <b>Total</b> |         |          | 126851.909 | 3838313.938 | 100.0000 |

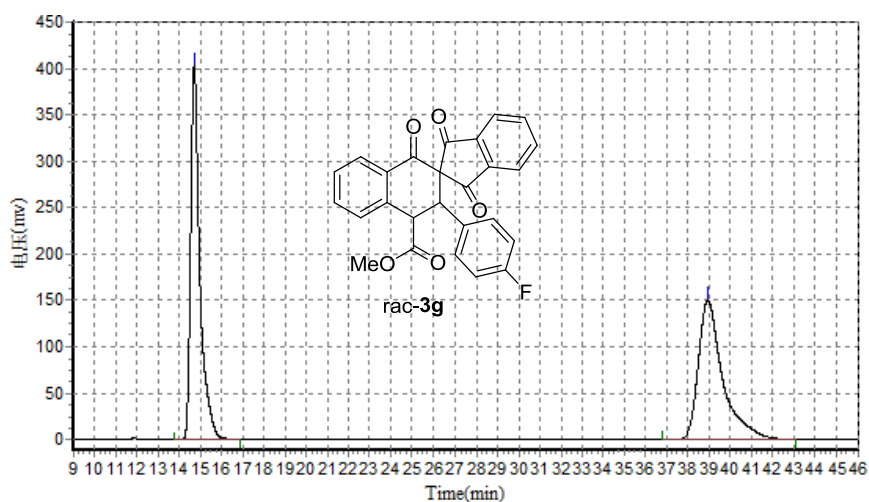

### Results

| Peak No.     | Peak ID | Ret Time | Height     | Area         | Conc.    |
|--------------|---------|----------|------------|--------------|----------|
| 1            |         | 14.703   | 403176.813 | 12102807.000 | 50.1380  |
| 2            |         | 38.942   | 149986.047 | 12036195.000 | 49.8620  |
| <b>Total</b> |         |          | 553162.859 | 24139002.000 | 100.0000 |

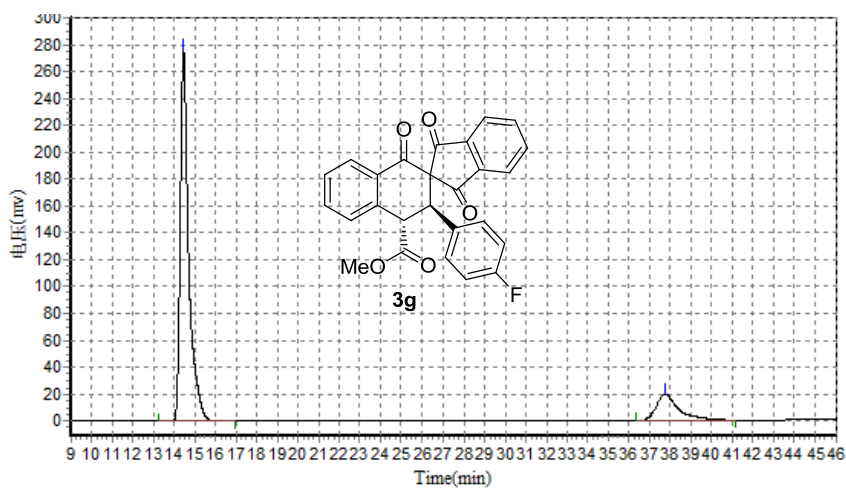

### Results

| Peak No.     | Peak ID | Ret Time | Height     | Area        | Conc.    |
|--------------|---------|----------|------------|-------------|----------|
| 1            |         | 14.447   | 274636.000 | 7821081.500 | 84.8055  |
| 2            |         | 37.740   | 19252.969  | 1401288.625 | 15.1945  |
| <b>Total</b> |         |          | 293888.969 | 9222370.125 | 100.0000 |

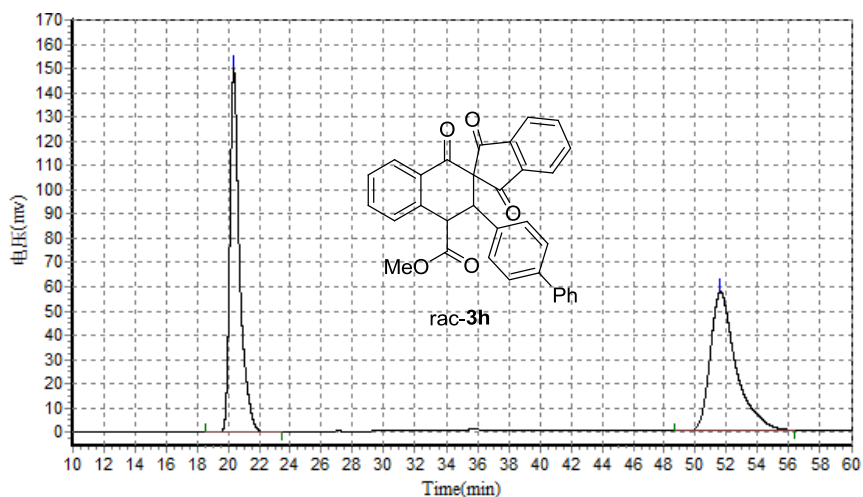

### Results

| Peak No.     | Peak ID | Ret Time | Height     | Area         | Conc.    |
|--------------|---------|----------|------------|--------------|----------|
| 1            |         | 20.357   | 149957.578 | 6597570.000  | 50.2015  |
| 2            |         | 51.610   | 56975.645  | 6544610.500  | 49.7985  |
| <b>Total</b> |         |          | 206933.223 | 13142180.500 | 100.0000 |

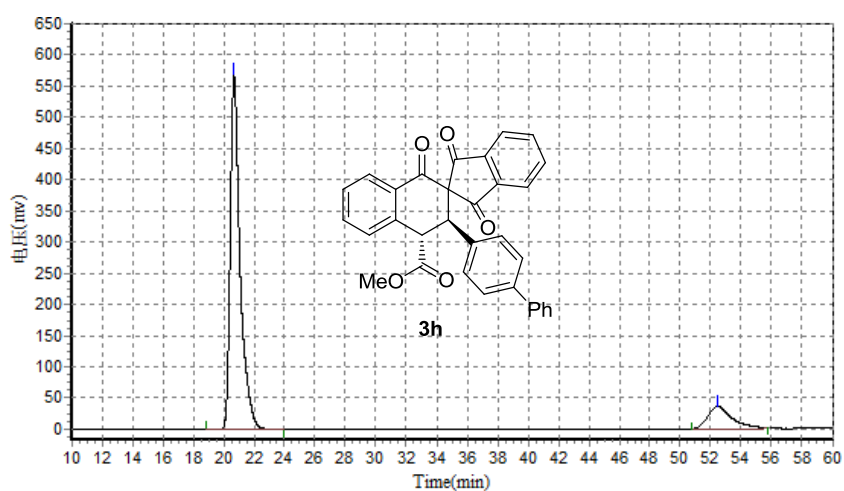

### Results

| Peak No.     | Peak ID | Ret Time | Height     | Area         | Conc.    |
|--------------|---------|----------|------------|--------------|----------|
| 1            |         | 20.678   | 565879.500 | 25471310.000 | 86.6673  |
| 2            |         | 52.465   | 35826.254  | 3918439.000  | 13.3327  |
| <b>Total</b> |         |          | 601705.754 | 29389749.000 | 100.0000 |

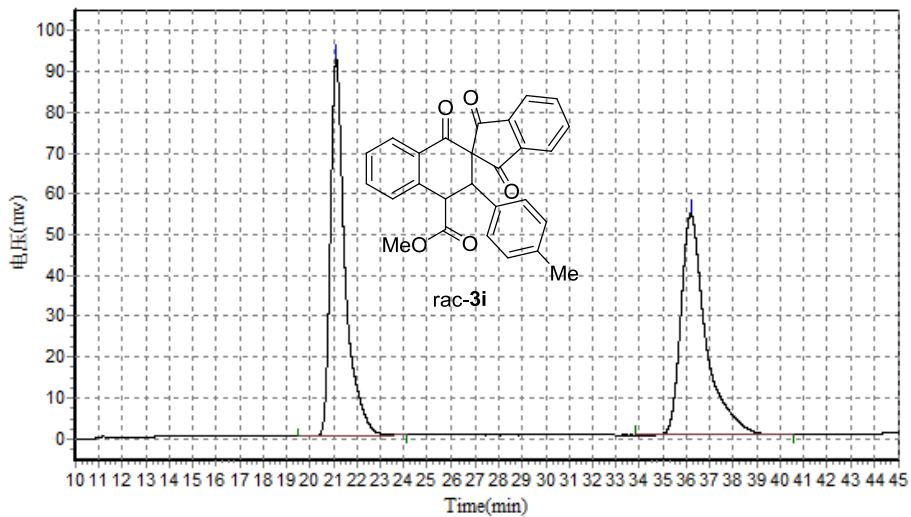

### Results

| Peak No.     | Peak ID | Ret Time | Height     | Area        | Conc.    |
|--------------|---------|----------|------------|-------------|----------|
| 1            |         | 21.120   | 92482.352  | 4028971.750 | 50.0392  |
| 2            |         | 36.182   | 54291.777  | 4022654.000 | 49.9608  |
| <b>Total</b> |         |          | 146774.129 | 8051625.750 | 100.0000 |

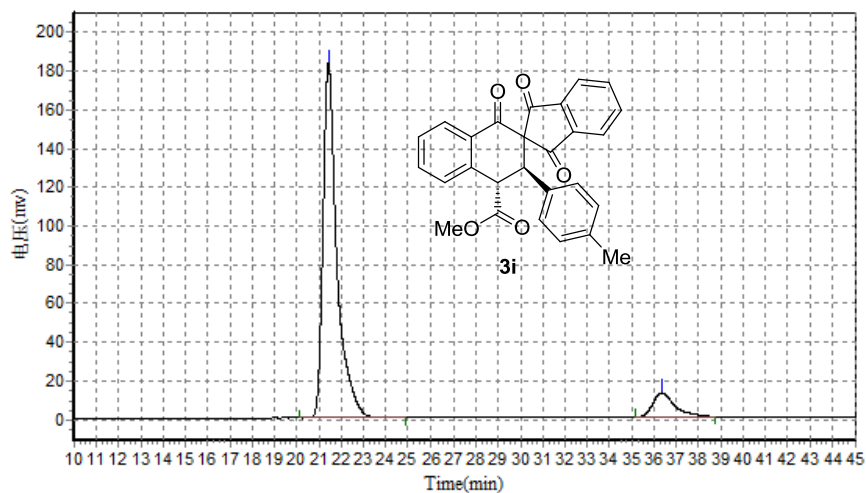

### Results

| Peak No.     | Peak ID | Ret Time | Height     | Area        | Conc.    |
|--------------|---------|----------|------------|-------------|----------|
| 1            |         | 21.430   | 183230.094 | 7988642.500 | 90.4015  |
| 2            |         | 36.355   | 12528.111  | 848205.625  | 9.5985   |
| <b>Total</b> |         |          | 195758.205 | 8836848.125 | 100.0000 |



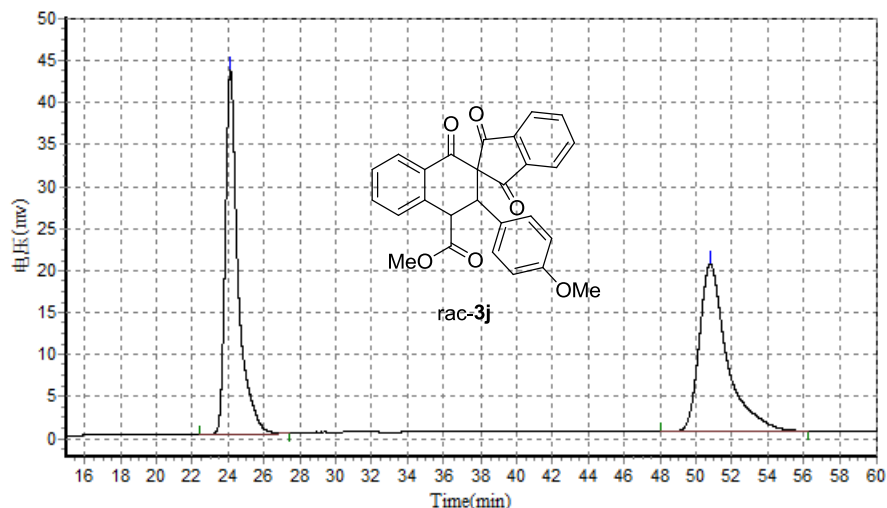

### Results

| Peak No.     | Peak ID | Ret Time | Height    | Area        | Conc.    |
|--------------|---------|----------|-----------|-------------|----------|
| 1            |         | 24.123   | 43280.566 | 2130183.750 | 49.8557  |
| 2            |         | 50.793   | 19936.539 | 2142513.000 | 50.1443  |
| <b>Total</b> |         |          | 63217.105 | 4272696.750 | 100.0000 |

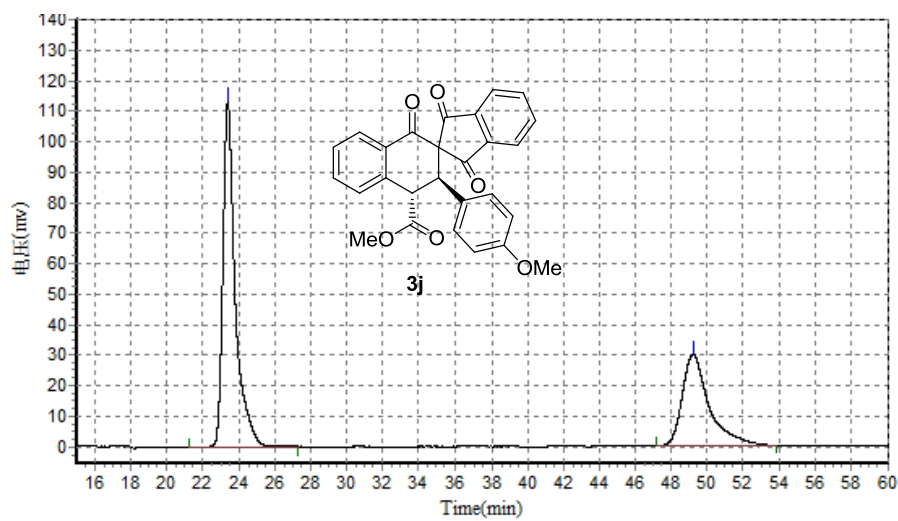

### Results

| Peak No.     | Peak ID | Ret Time | Height     | Area        | Conc.    |
|--------------|---------|----------|------------|-------------|----------|
| 1            |         | 23.392   | 113054.180 | 5364233.000 | 63.8465  |
| 2            |         | 49.205   | 29823.295  | 3037529.500 | 36.1535  |
| <b>Total</b> |         |          | 142877.475 | 8401762.500 | 100.0000 |

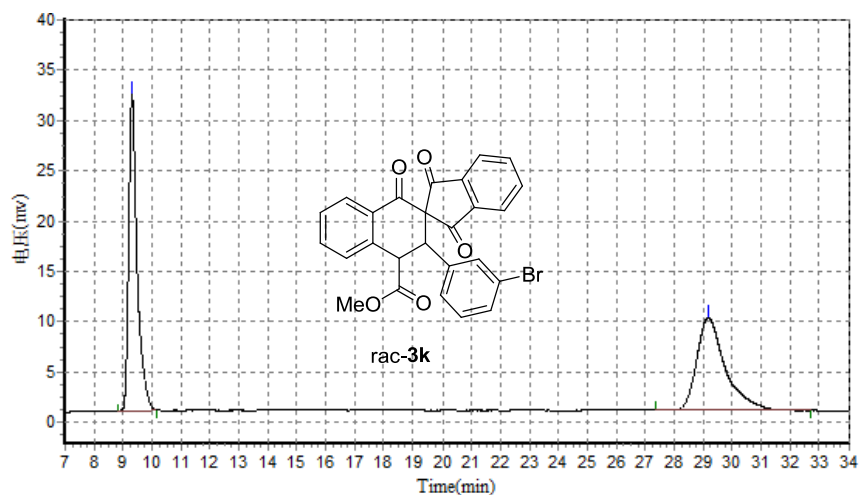

### Results

| Peak No.     | Peak ID | Ret Time | Height    | Area        | Conc.    |
|--------------|---------|----------|-----------|-------------|----------|
| 1            |         | 9.308    | 31420.369 | 634894.438  | 50.3948  |
| 2            |         | 29.178   | 9195.264  | 624946.313  | 49.6052  |
| <b>Total</b> |         |          | 40615.633 | 1259840.750 | 100.0000 |

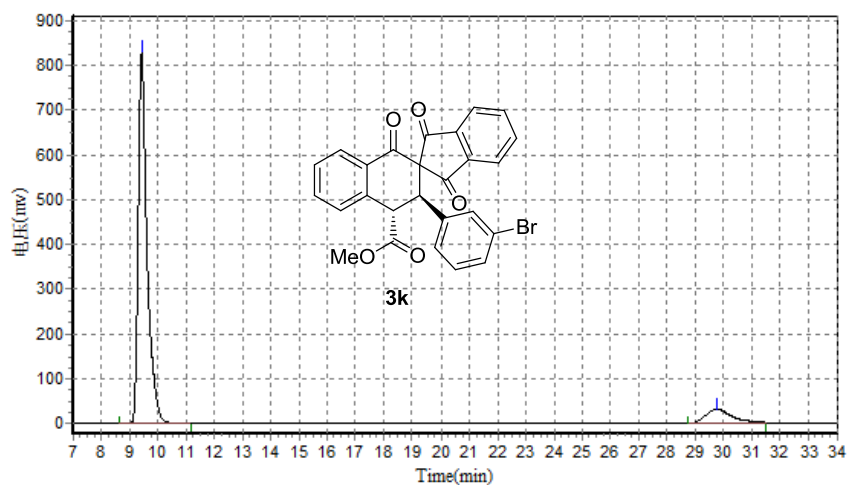

### Results

| Peak No.     | Peak ID | Ret Time | Height     | Area         | Conc.    |
|--------------|---------|----------|------------|--------------|----------|
| 1            |         | 9.418    | 826235.438 | 17994558.000 | 89.8941  |
| 2            |         | 29.748   | 31525.049  | 2022956.625  | 10.1059  |
| <b>Total</b> |         |          | 857760.486 | 20017514.625 | 100.0000 |

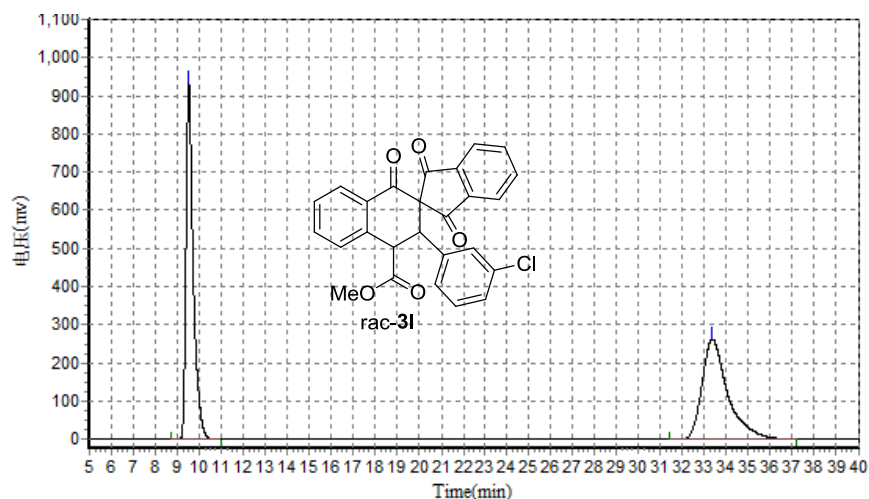

### Results

| Peak No.     | Peak ID | Ret Time | Height      | Area         | Conc.    |
|--------------|---------|----------|-------------|--------------|----------|
| 1            |         | 9.532    | 930646.188  | 21201748.000 | 49.7691  |
| 2            |         | 33.370   | 261600.984  | 21398432.000 | 50.2309  |
| <b>Total</b> |         |          | 1192247.172 | 42600180.000 | 100.0000 |

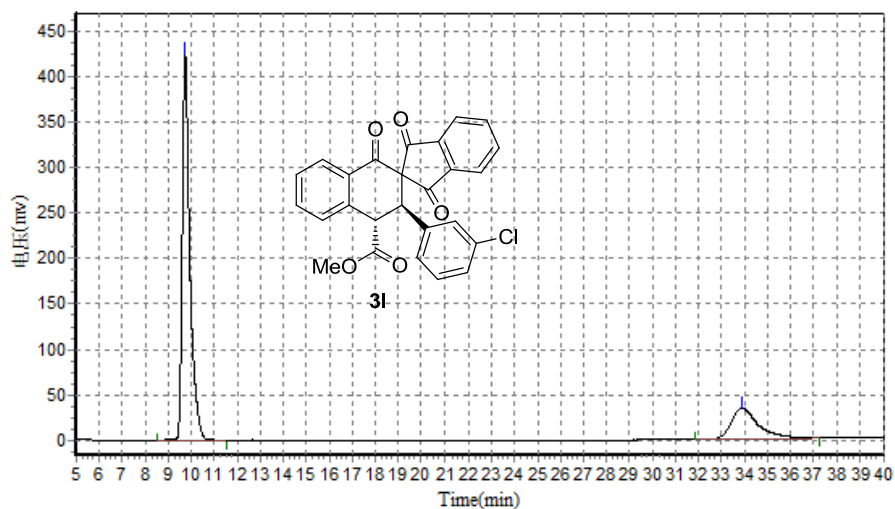

### Results

| Peak No.     | Peak ID | Ret Time | Height     | Area         | Conc.    |
|--------------|---------|----------|------------|--------------|----------|
| 1            |         | 9.733    | 422902.156 | 9649351.000  | 77.4473  |
| 2            |         | 33.888   | 34277.703  | 2809903.000  | 22.5527  |
| <b>Total</b> |         |          | 457179.859 | 12459254.000 | 100.0000 |

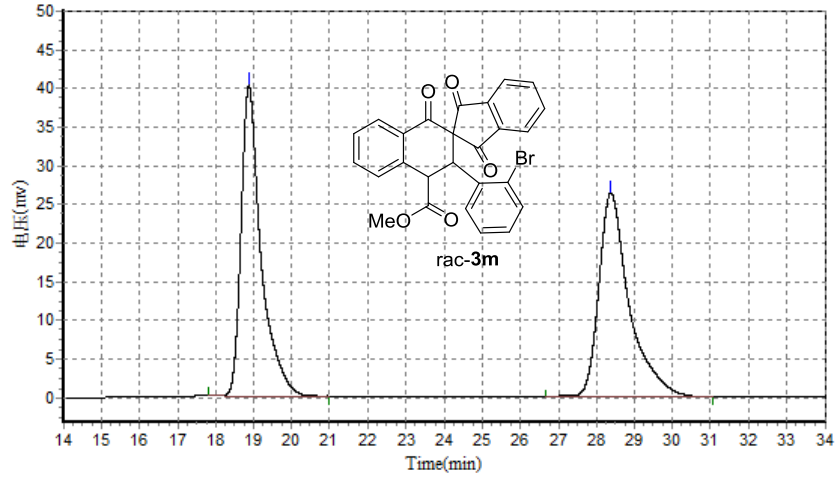

### Results

| Peak No.     | Peak ID | Ret Time | Height    | Area        | Conc.    |
|--------------|---------|----------|-----------|-------------|----------|
| 1            |         | 18.875   | 40157.469 | 1462333.000 | 50.0005  |
| 2            |         | 28.377   | 26360.756 | 1462304.500 | 49.9995  |
| <b>Total</b> |         |          | 66518.225 | 2924637.500 | 100.0000 |

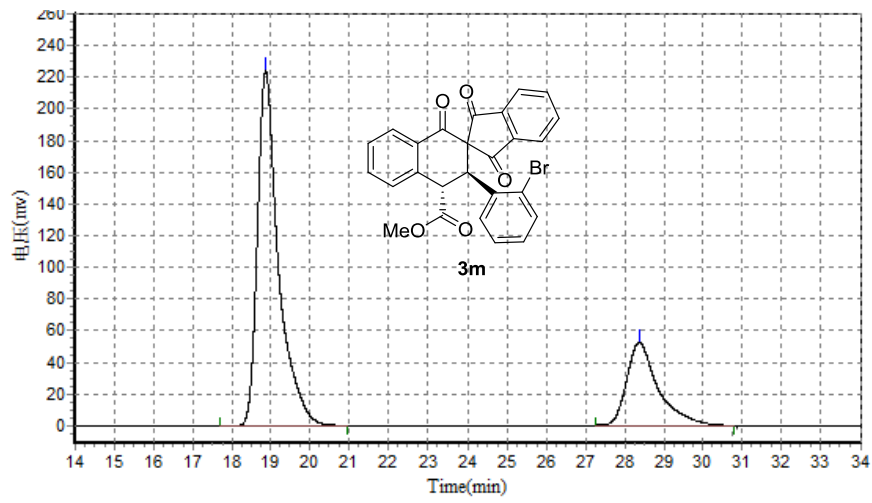

### Results

| Peak No.     | Peak ID | Ret Time | Height     | Area         | Conc.    |
|--------------|---------|----------|------------|--------------|----------|
| 1            |         | 18.863   | 223519.297 | 8315795.500  | 75.1127  |
| 2            |         | 28.365   | 51428.359  | 2755297.000  | 24.8873  |
| <b>Total</b> |         |          | 274947.656 | 11071092.500 | 100.0000 |

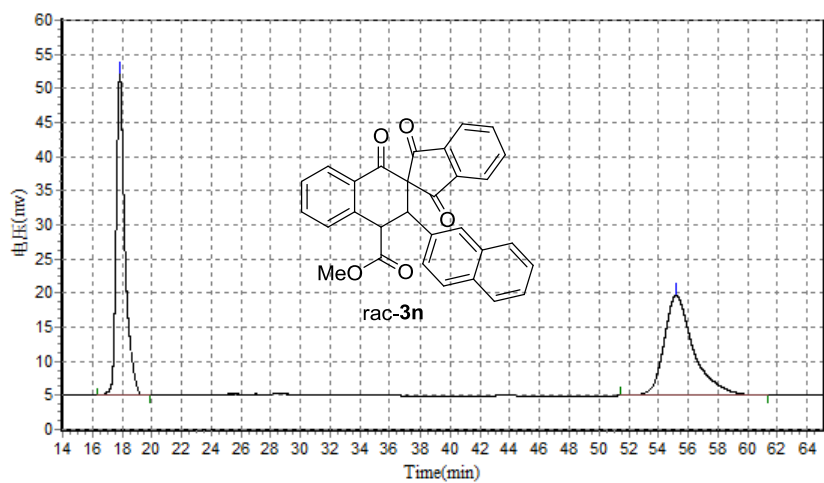

### Results

| Peak No.     | Peak ID | Ret Time | Height    | Area        | Conc.    |
|--------------|---------|----------|-----------|-------------|----------|
| 1            |         | 17.845   | 47813.891 | 2011220.625 | 50.1185  |
| 2            |         | 55.188   | 14642.953 | 2001706.500 | 49.8815  |
| <b>Total</b> |         |          | 62456.844 | 4012927.125 | 100.0000 |

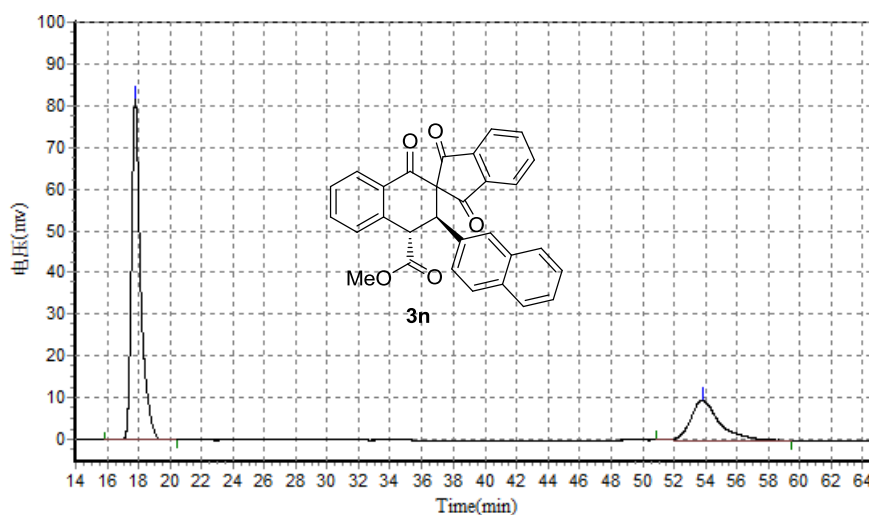

### Results

| Peak No.     | Peak ID | Ret Time | Height    | Area        | Conc.    |
|--------------|---------|----------|-----------|-------------|----------|
| 1            |         | 17.787   | 81683.664 | 3345266.500 | 73.4752  |
| 2            |         | 53.817   | 9546.980  | 1207650.875 | 26.5248  |
| <b>Total</b> |         |          | 91230.645 | 4552917.375 | 100.0000 |

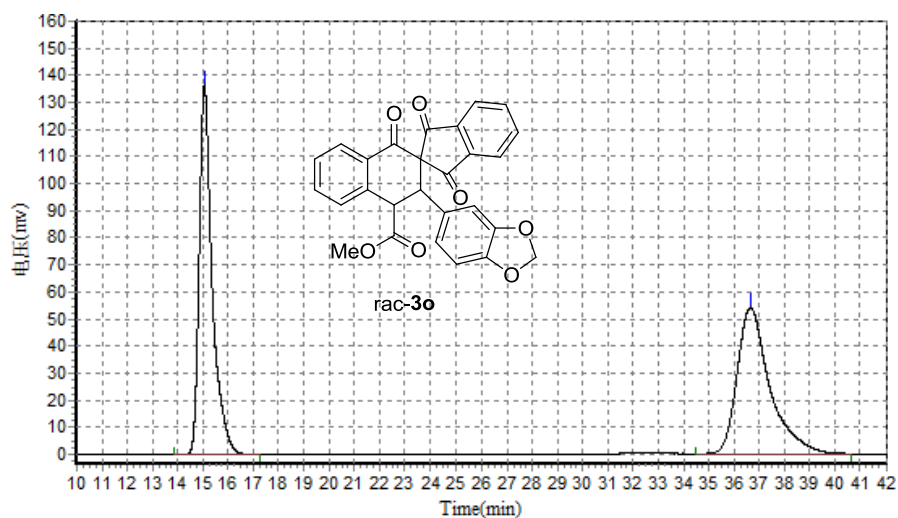

### Results

| Peak No.     | Peak ID | Ret Time | Height     | Area        | Conc.    |
|--------------|---------|----------|------------|-------------|----------|
| 1            |         | 15.058   | 136497.406 | 4865779.000 | 50.1383  |
| 2            |         | 36.650   | 53963.191  | 4838931.000 | 49.8617  |
| <b>Total</b> |         |          | 190460.598 | 9704710.000 | 100.0000 |

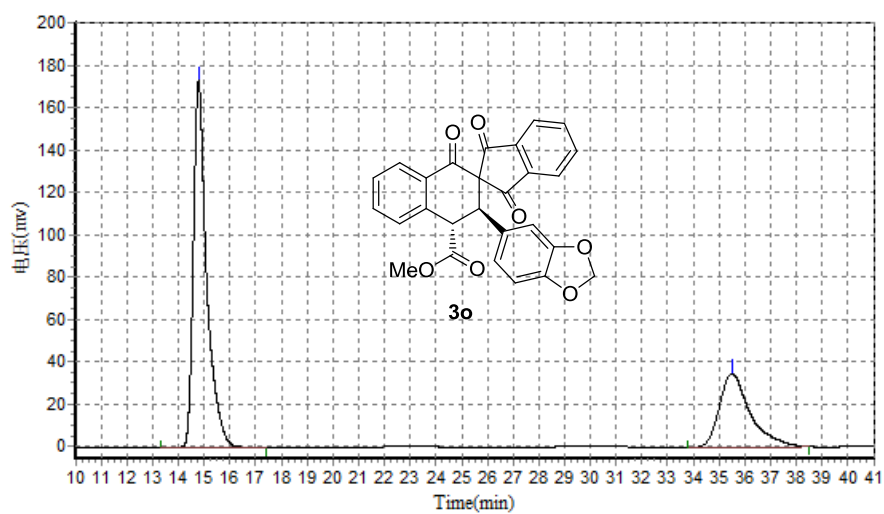

### Results

| Peak No.     | Peak ID | Ret Time | Height     | Area        | Conc.    |
|--------------|---------|----------|------------|-------------|----------|
| 1            |         | 14.775   | 172868.156 | 6204607.000 | 68.1617  |
| 2            |         | 35.503   | 34850.316  | 2898169.250 | 31.8383  |
| <b>Total</b> |         |          | 207718.473 | 9102776.250 | 100.0000 |

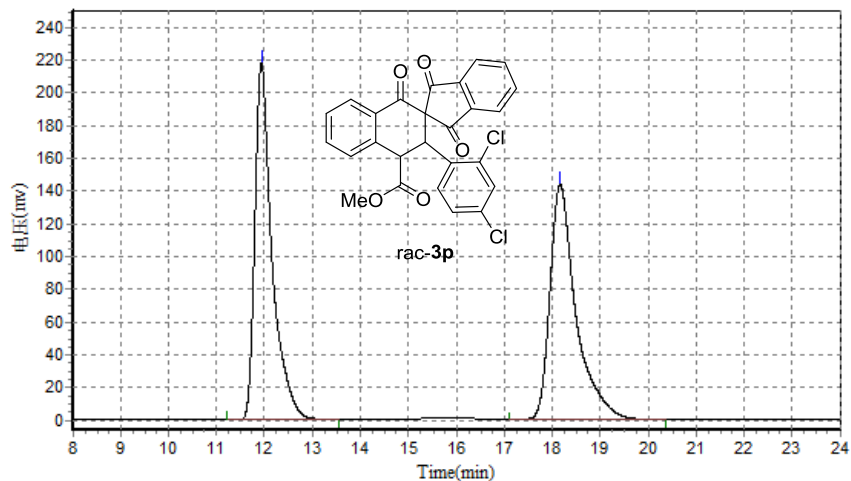

### Results

| Peak No.     | Peak ID | Ret Time | Height     | Area         | Conc.    |
|--------------|---------|----------|------------|--------------|----------|
| 1            |         | 11.937   | 217454.844 | 5405534.500  | 50.1190  |
| 2            |         | 18.158   | 143143.828 | 5379861.500  | 49.8810  |
| <b>Total</b> |         |          | 360598.672 | 10785396.000 | 100.0000 |

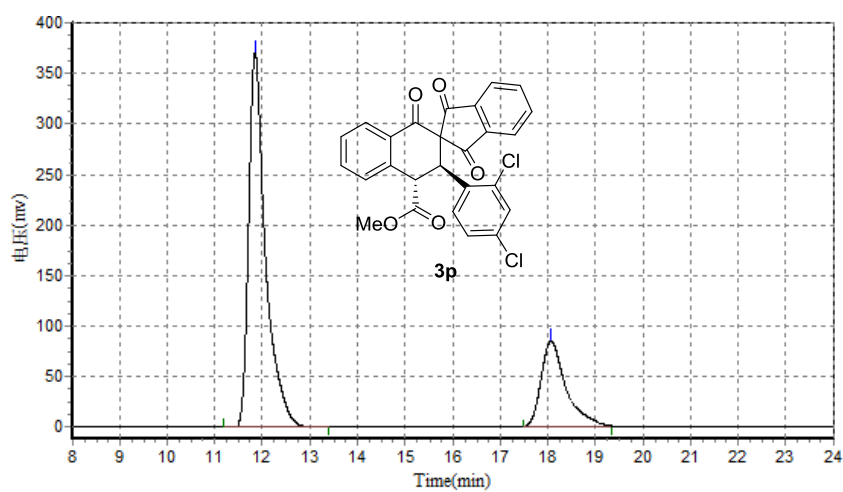

### Results

| Peak No.     | Peak ID | Ret Time | Height     | Area         | Conc.    |
|--------------|---------|----------|------------|--------------|----------|
| 1            |         | 11.847   | 370588.906 | 9136808.000  | 74.7392  |
| 2            |         | 18.060   | 84606.188  | 3088111.250  | 25.2608  |
| <b>Total</b> |         |          | 455195.094 | 12224919.250 | 100.0000 |

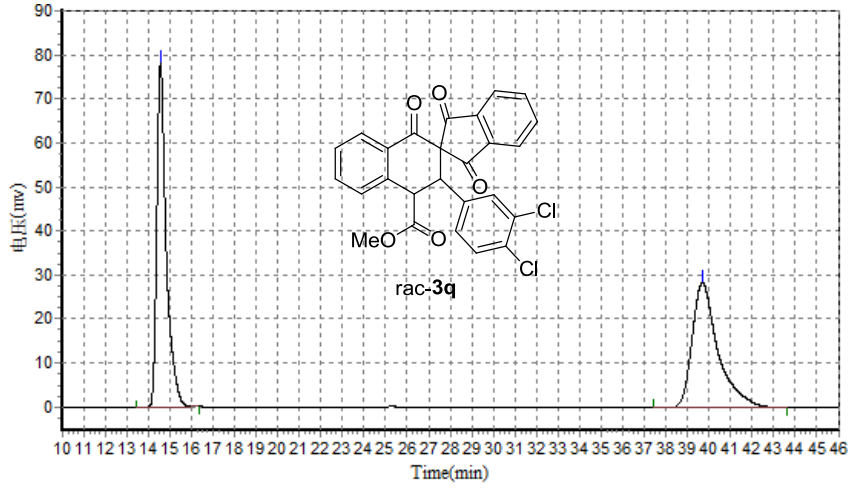

### Results

| Peak No.     | Peak ID | Ret Time | Height     | Area        | Conc.    |
|--------------|---------|----------|------------|-------------|----------|
| 1            |         | 14.557   | 78111.055  | 2371497.500 | 49.8680  |
| 2            |         | 39.702   | 28330.479  | 2384049.500 | 50.1320  |
| <b>Total</b> |         |          | 106441.533 | 4755547.000 | 100.0000 |

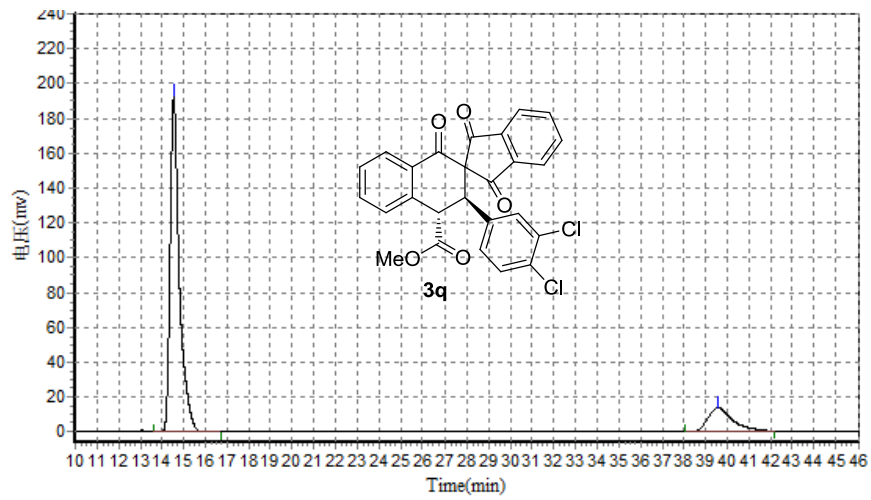

### Results

| Peak No.     | Peak ID | Ret Time | Height     | Area        | Conc.    |
|--------------|---------|----------|------------|-------------|----------|
| 1            |         | 14.538   | 191760.063 | 5686325.000 | 84.9506  |
| 2            |         | 39.562   | 13553.083  | 1007356.750 | 15.0494  |
| <b>Total</b> |         |          | 205313.146 | 6693681.750 | 100.0000 |



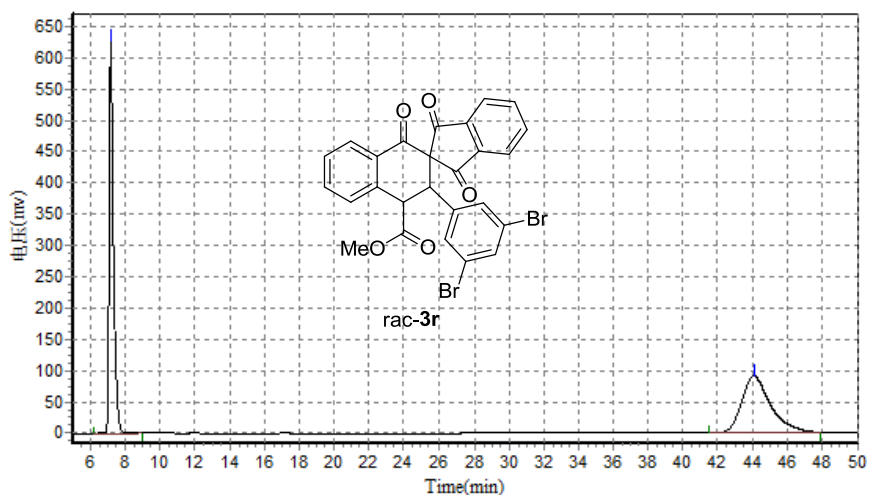

### Results

| Peak No.     | Peak ID | Ret Time | Height     | Area         | Conc.    |
|--------------|---------|----------|------------|--------------|----------|
| 1            |         | 7.157    | 623774.875 | 10567547.000 | 50.3207  |
| 2            |         | 44.083   | 90327.930  | 10432833.000 | 49.6793  |
| <b>Total</b> |         |          | 714102.805 | 21000380.000 | 100.0000 |

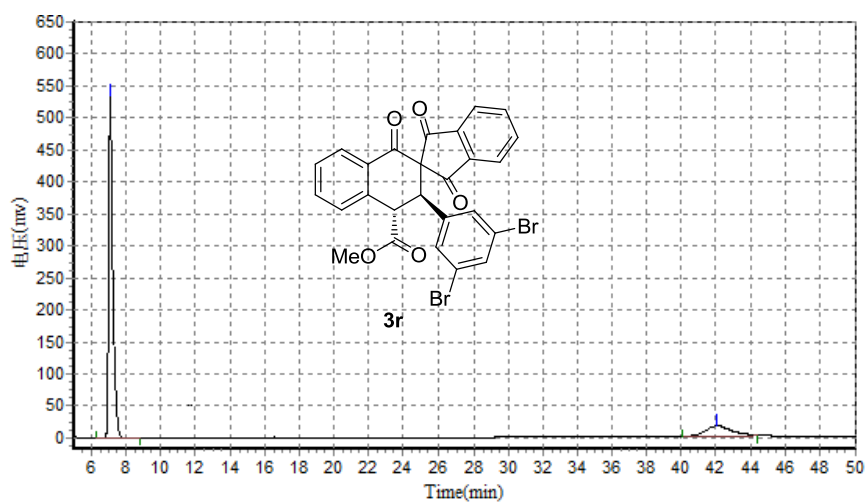

### Results

| Peak No.     | Peak ID | Ret Time | Height     | Area         | Conc.    |
|--------------|---------|----------|------------|--------------|----------|
| 1            |         | 7.073    | 532768.063 | 8702543.000  | 84.8395  |
| 2            |         | 42.065   | 15551.573  | 1555110.750  | 15.1605  |
| <b>Total</b> |         |          | 548319.636 | 10257653.750 | 100.0000 |

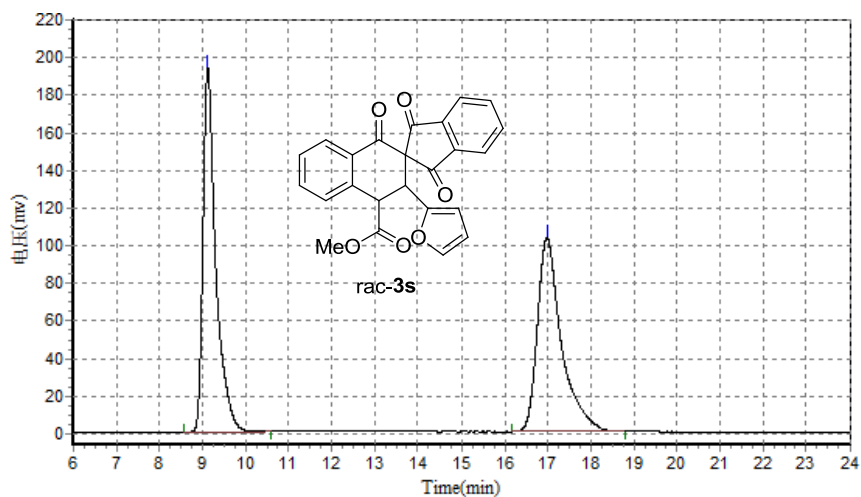

### Results

| Peak No.     | Peak ID | Ret Time | Height     | Area        | Conc.    |
|--------------|---------|----------|------------|-------------|----------|
| 1            |         | 9.122    | 193014.828 | 3981055.000 | 49.8393  |
| 2            |         | 16.973   | 102974.742 | 4006725.250 | 50.1607  |
| <b>Total</b> |         |          | 295989.570 | 7987780.250 | 100.0000 |

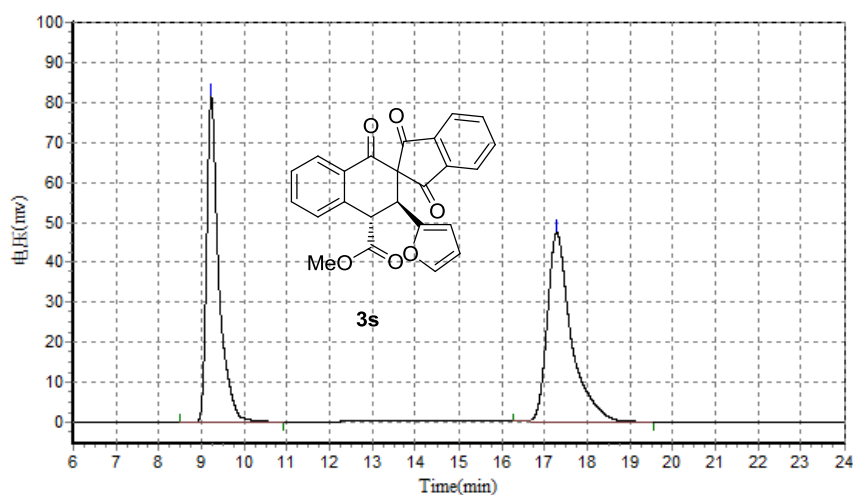

### Results

| Peak No.     | Peak ID | Ret Time | Height     | Area        | Conc.    |
|--------------|---------|----------|------------|-------------|----------|
| 1            |         | 9.228    | 81345.203  | 1629736.000 | 47.1761  |
| 2            |         | 17.283   | 47179.543  | 1824841.125 | 52.8239  |
| <b>Total</b> |         |          | 128524.746 | 3454577.125 | 100.0000 |

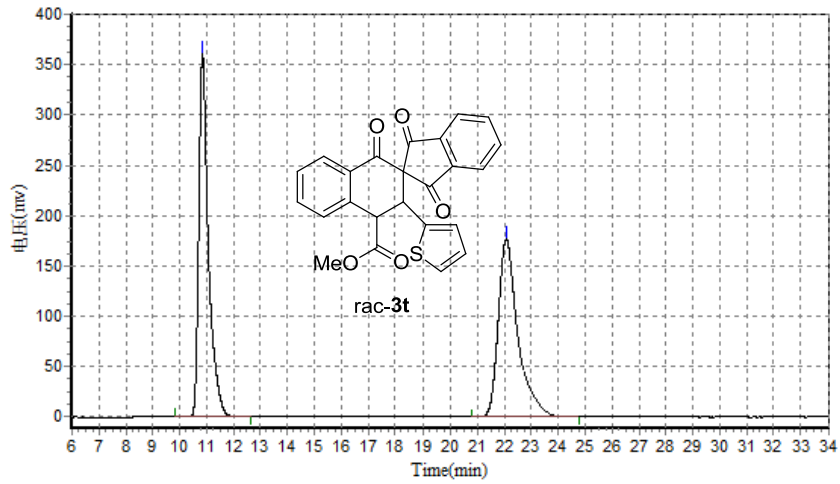

### Results

| Peak No.     | Peak ID | Ret Time | Height     | Area         | Conc.    |
|--------------|---------|----------|------------|--------------|----------|
| 1            |         | 10.843   | 360366.906 | 8941688.000  | 49.7549  |
| 2            |         | 22.070   | 176462.703 | 9029800.000  | 50.2451  |
| <b>Total</b> |         |          | 536829.609 | 17971488.000 | 100.0000 |

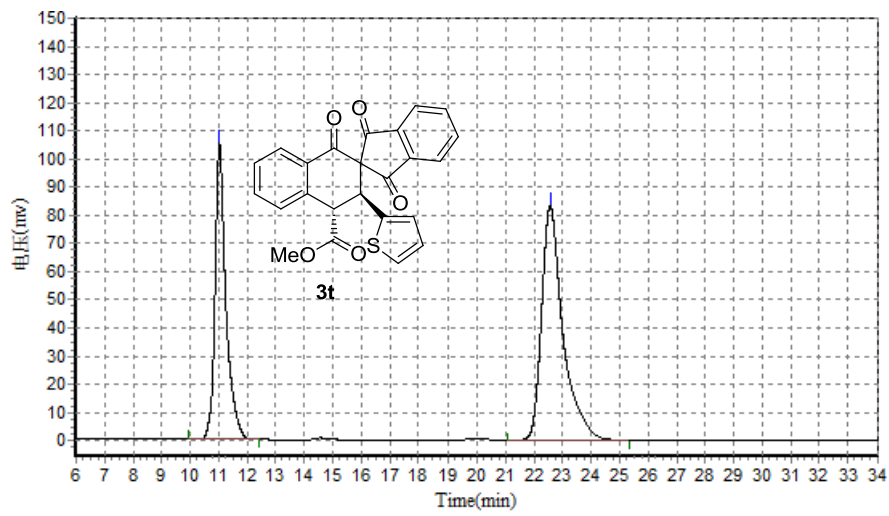

### Results

| Peak No.     | Peak ID | Ret Time | Height     | Area        | Conc.    |
|--------------|---------|----------|------------|-------------|----------|
| 1            |         | 11.022   | 104758.867 | 2764435.250 | 39.0313  |
| 2            |         | 22.563   | 83085.281  | 4318175.000 | 60.9687  |
| <b>Total</b> |         |          | 187844.148 | 7082610.250 | 100.0000 |

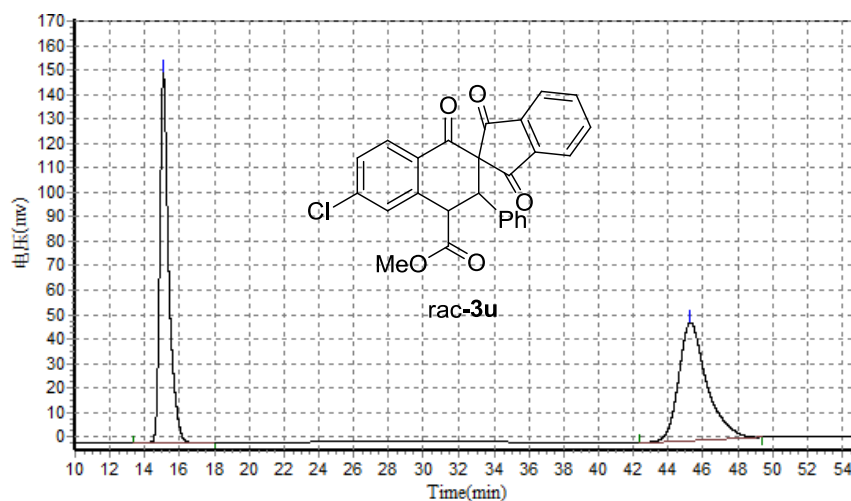

### Results

| Peak No.     | Peak ID | Ret Time | Height     | Area         | Conc.    |
|--------------|---------|----------|------------|--------------|----------|
| 1            |         | 15.072   | 150856.266 | 5358462.000  | 49.8926  |
| 2            |         | 45.280   | 48175.836  | 5381528.500  | 50.1074  |
| <b>Total</b> |         |          | 199032.102 | 10739990.500 | 100.0000 |

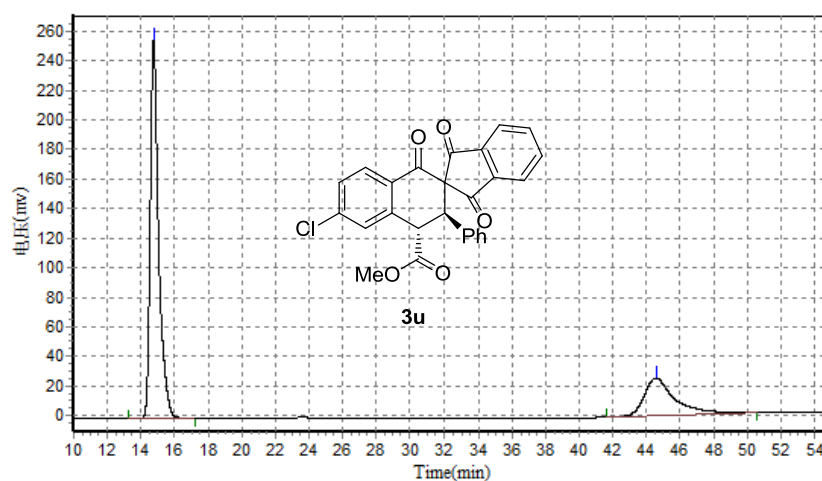

### Results

| Peak No.     | Peak ID | Ret Time | Height     | Area         | Conc.    |
|--------------|---------|----------|------------|--------------|----------|
| 1            |         | 14.753   | 255260.391 | 8801070.000  | 72.9211  |
| 2            |         | 44.563   | 25479.232  | 3268232.000  | 27.0789  |
| <b>Total</b> |         |          | 280739.623 | 12069302.000 | 100.0000 |

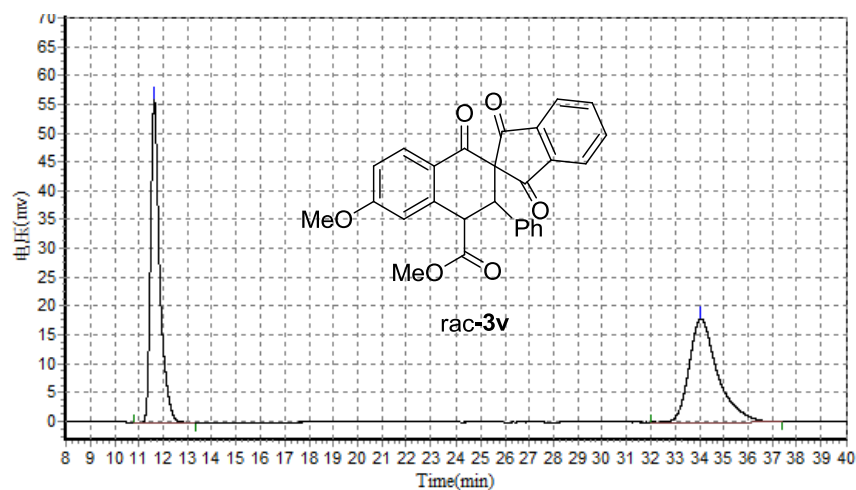

### Results

| Peak No.     | Peak ID | Ret Time | Height    | Area        | Conc.    |
|--------------|---------|----------|-----------|-------------|----------|
| 1            |         | 11.630   | 56085.117 | 1460984.125 | 50.1382  |
| 2            |         | 34.058   | 17955.318 | 1452932.375 | 49.8618  |
| <b>Total</b> |         |          | 74040.436 | 2913916.500 | 100.0000 |

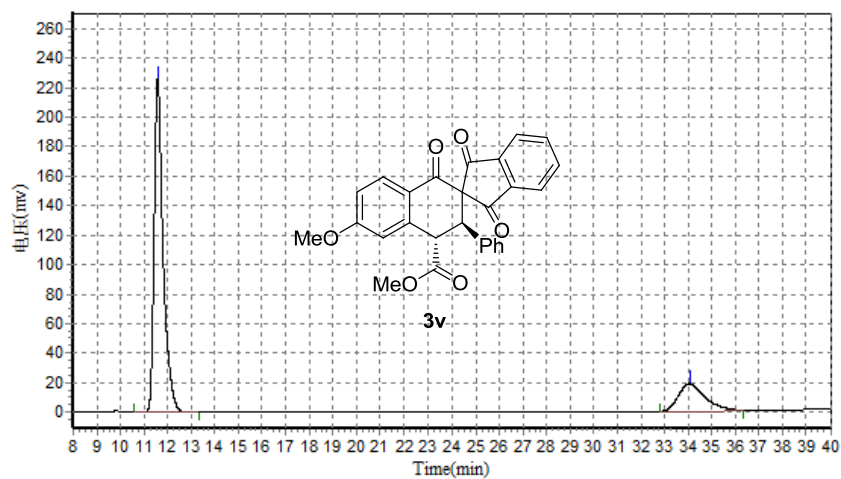

### Results

| Peak No.     | Peak ID | Ret Time | Height     | Area        | Conc.    |
|--------------|---------|----------|------------|-------------|----------|
| 1            |         | 11.578   | 226267.219 | 5971486.500 | 80.0734  |
| 2            |         | 34.063   | 18759.893  | 1486025.625 | 19.9266  |
| <b>Total</b> |         |          | 245027.111 | 7457512.125 | 100.0000 |

Compound **3h** transformed from product **3e**

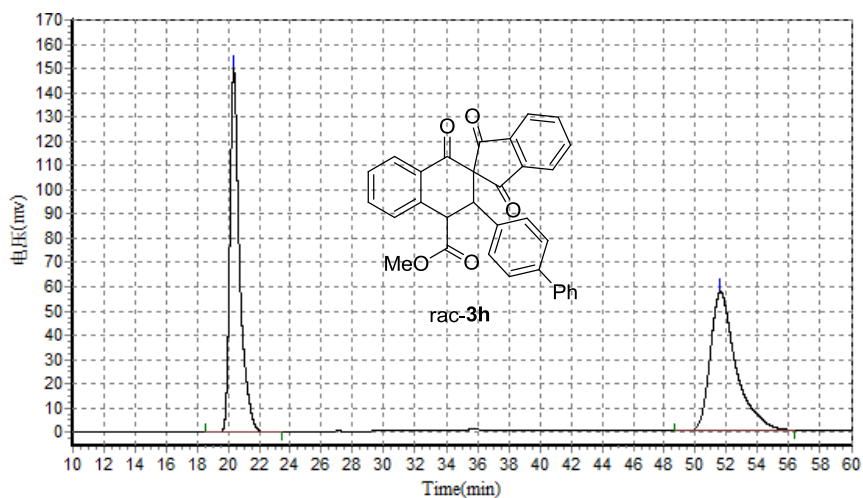

**Results**

| Peak No.     | Peak ID | Ret Time | Height     | Area         | Conc.    |
|--------------|---------|----------|------------|--------------|----------|
| 1            |         | 20.357   | 149957.578 | 6597570.000  | 50.2015  |
| 2            |         | 51.610   | 56975.645  | 6544610.500  | 49.7985  |
| <b>Total</b> |         |          | 206933.223 | 13142180.500 | 100.0000 |

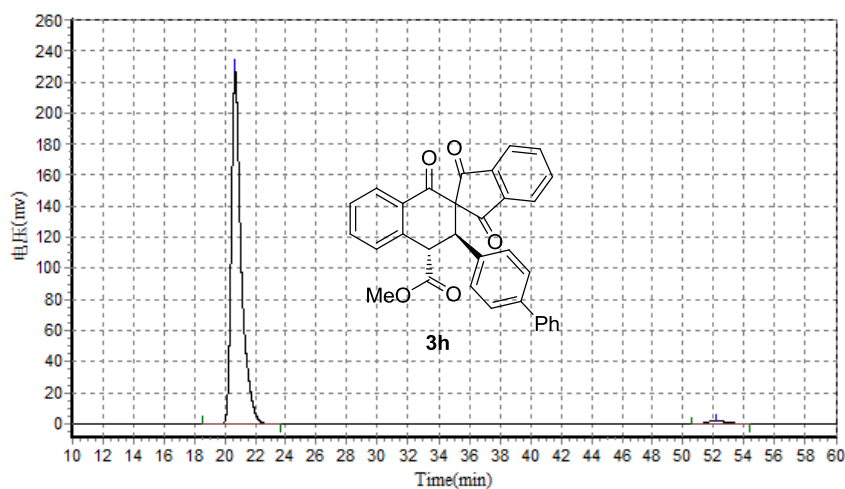

**Results**

| Peak No.     | Peak ID | Ret Time | Height     | Area        | Conc.    |
|--------------|---------|----------|------------|-------------|----------|
| 1            |         | 20.531   | 229462.416 | 6746210.000 | 97.3685  |
| 2            |         | 52.288   | 2311.835   | 151472.000  | 2.6315   |
| <b>Total</b> |         |          | 231774.251 | 6897682.000 | 100.0000 |

### 3. X-ray Analysis of Product 3e

The crystal data of compound **3e** have been deposited in CCDC with number 1584009.

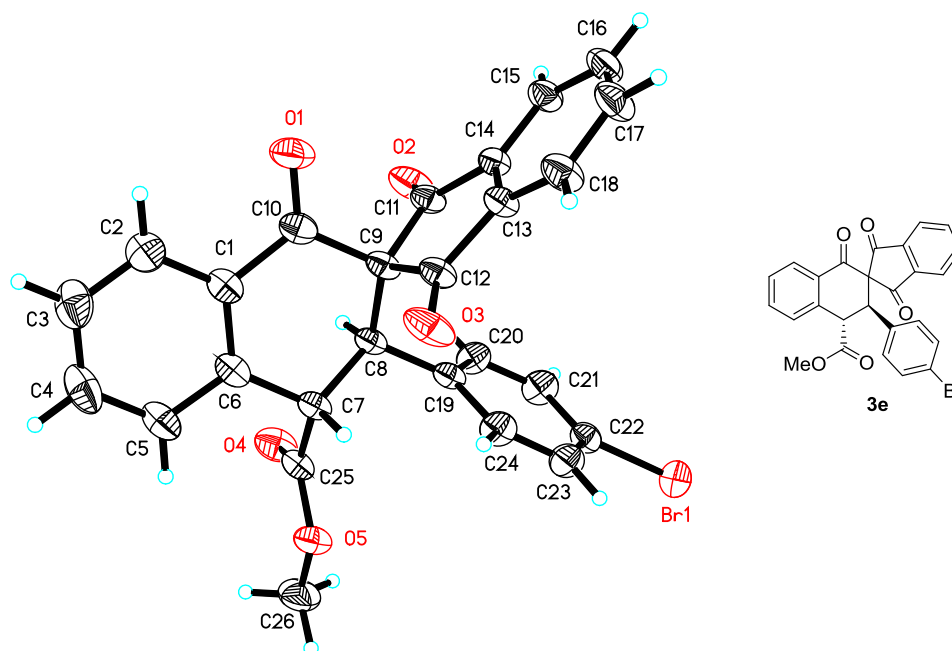

Table 1. Crystal data and structure refinement for compound **3e**.

|                                 |                                                   |          |
|---------------------------------|---------------------------------------------------|----------|
| Identification code             | d8v17497                                          |          |
| Empirical formula               | C <sub>26</sub> H <sub>17</sub> Br O <sub>5</sub> |          |
| Formula weight                  | 489.30                                            |          |
| Temperature                     | 296(2) K                                          |          |
| Wavelength                      | 0.71073 Å                                         |          |
| Crystal system                  | Orthorhombic                                      |          |
| Space group                     | P 21 21 21                                        |          |
| Unit cell dimensions            | a = 8.3403(2) Å                                   | α = 90 ° |
|                                 | b = 15.6568(4) Å                                  | β = 90 ° |
|                                 | c = 16.7849(4) Å                                  | γ = 90 ° |
| Volume                          | 2191.81(9) Å <sup>3</sup>                         |          |
| Z                               | 4                                                 |          |
| Density (calculated)            | 1.483 Mg/m <sup>3</sup>                           |          |
| Absorption coefficient          | 1.911 mm <sup>-1</sup>                            |          |
| F(000)                          | 992                                               |          |
| Crystal size                    | 0.200 x 0.170 x 0.120 mm <sup>3</sup>             |          |
| Theta range for data collection | 2.754 to 26.000 °                                 |          |
| Index ranges                    | -10 ≤ h ≤ 10, -19 ≤ k ≤ 19, -20 ≤ l ≤ 20          |          |
| Reflections collected           | 36594                                             |          |

|                                   |                                             |
|-----------------------------------|---------------------------------------------|
| Independent reflections           | 4270 [R(int) = 0.0405]                      |
| Completeness to theta = 25.242 °  | 99.1 %                                      |
| Absorption correction             | Semi-empirical from equivalents             |
| Max. and min. transmission        | 0.7456 and 0.5252                           |
| Refinement method                 | Full-matrix least-squares on F <sup>2</sup> |
| Data / restraints / parameters    | 4270 / 0 / 291                              |
| Goodness-of-fit on F <sup>2</sup> | 1.022                                       |
| Final R indices [I>2sigma(I)]     | R1 = 0.0276, wR2 = 0.0669                   |
| R indices (all data)              | R1 = 0.0327, wR2 = 0.0694                   |
| Absolute structure parameter      | 0.011(3)                                    |
| Extinction coefficient            | 0.025(2)                                    |
| Largest diff. peak and hole       | 0.311 and -0.347 e.Å <sup>-3</sup>          |
